# Supplementary material for: Catalysis by the JmjC histone demethylase KDM4A integrates substrate dynamics, correlated motions and molecular orbital control
Source: PubMed Central journal article supplement — Chem Sci. 2020 Sep 4;11(36):9950–61. doi: 10.1039/d0sc03713c (PMC8162366; doi:10.1039/d0sc03713c), 2020-09-04
Supplement: SC-011-D0SC03713C-s001.pdf [file SC-011-D0SC03713C-s001.pdf]

*Electronic supplementary information*

**Catalysis By the JmjC Histone Demethylase KDM4A Integrates  
Substrate Dynamics, Correlated Motions and Molecular Orbital  
Control**

Rajeev Ramanan,<sup>a</sup> Shobhit S. Chaturvedi,<sup>a</sup> Nicolai Lehnert,<sup>b</sup> Christopher J. Schofield,<sup>c</sup> Tatyana G. Karabancheva-Christova,<sup>a,\*</sup> and Christo Z. Christov.<sup>a,\*</sup>

<sup>a</sup> Department of Chemistry, Michigan Technological University, Houghton, Michigan 49931, USA.

<sup>b</sup> Department of Chemistry, University of Michigan, Ann Arbor, MI, 48019, USA

<sup>c</sup> The Chemistry Research Laboratory, Mansfield Road, University of Oxford, OX1 5JJ, United Kingdom.

\* E-mail: [tatyanak.@mtu.edu](mailto:tatyanak.@mtu.edu), [christov@mtu.edu](mailto:christov@mtu.edu).

### List of Figures

|            |                                                                                             |     |
|------------|---------------------------------------------------------------------------------------------|-----|
| Figure S1  | Secondary structure of H3(7-12)K9me3 bound complex of KDM4A                                 | S3  |
| Figure S2  | Details of the QM/MM modeled oxygen activation step in KDM4A catalysis                      | S8  |
| Figure S3  | Dynamic cross correlation diagrams                                                          | S10 |
| Figure S4  | Spin Natural Orbitals (SNO) for the Fe-superoxide complex                                   | S11 |
| Figure S5  | Distance plot for the Fe(III)-O <sub>2</sub> .H3(7-12)K9me3 complex                         | S12 |
| Figure S6  | Distance plot for the Fe(IV)-oxo.succinate.H3(7-12)K9me3 complex                            | S12 |
| Figure S7  | Superimposed geometries of the optimized reactant with the HAT transition state             | S13 |
| Figure S8  | QM(B1)/MM optimized geometry of rebound step                                                | S13 |
| Figure S9  | Potential energy profile for O <sub>2</sub> activation in the presence of the cyclicpeptide | S14 |
| Figure S10 | Hydrogen-bonding pattern in KDM4A-CP2 complex                                               | S14 |
| Figure S11 | Radii of gyration of the Fe(IV)-oxo active site in KDM4A and PHF8                           | S15 |

### List of Tables

|             |                                     |         |
|-------------|-------------------------------------|---------|
| Table S1-S8 | Mulliken Spin Densities and Charges | S15-S20 |
|-------------|-------------------------------------|---------|

### Other Information

|                                                                        |     |
|------------------------------------------------------------------------|-----|
| Methods                                                                | S3  |
| Details of oxygen activation by KDM4A                                  | S6  |
| Details of correlated motions in the CP2(R6Kme3) complex               | S10 |
| The cartesian coordinates of the optimized QM region of QM/MM geometry | S21 |
| References                                                             | S28 |

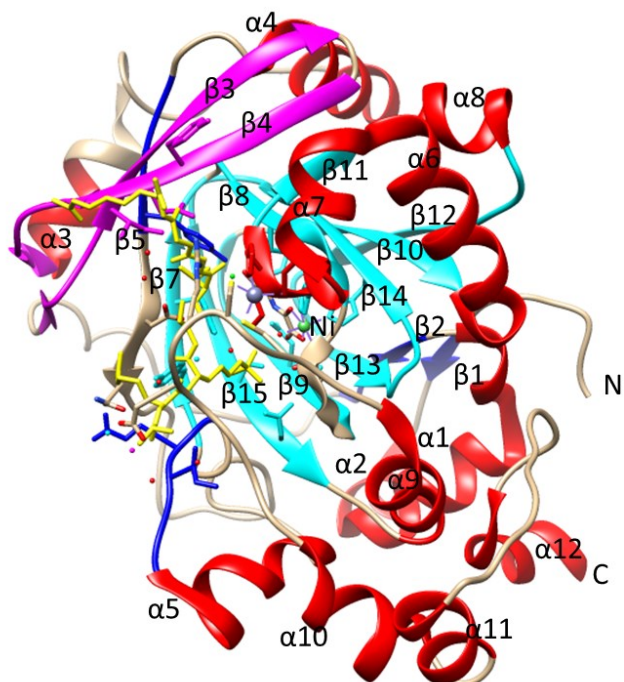

**Figure S1.** Secondary elements of the KDM4A.Ni.N-oxalylglycine.H3(7-12)K9me3 complex structure (based on PDB: 2oq6).

## Methods

**1. System Setup and MD Simulation:** Crystal structures of the catalytic domain of KDM4A bound to the H3(7-12)K9me3 natural substrate (PDB ID: 2OQ6)<sup>1</sup> or to a cyclic peptide substrate analogue / inhibitor (PDB ID: 5LY1)<sup>1</sup> were used. The Ni in the crystal structure was replaced with Fe(II) and the 2OG analogue N-oxalylglycine (NOG) was modified to 2OG by replacing its NH with a methylene group. A crystal structure of PHF8 complexed with an H3(1-14)K4me3K9me2 substrate fragment (PDB ID: 3KV4)<sup>1</sup> was treated similarly to the KDM4 structures (NOG was modified to 2OG). Missing hydrogen atoms and counter ions for neutralization were added with the Leap module of Amber16.<sup>2</sup> Parameters for non-standard ligands /residues such as 2OG and the

substrate were developed using Antechamber as implemented in Amber. Parameters for the metal ion (Fe(II)) at the active site were prepared using the Metal Center Parameter Builder (MCPB.py).<sup>3</sup> Parameters were generated for both the Fe(III)-superoxo and Fe(IV)-oxo complexes for the respective MD simulations. The Fe(II) is high spin (S=2, M=5) in its ground state, as shown in previous studies<sup>4</sup> and is coordinated with: 2OG (bidentate), two histidine residues and one glutamic acid (monodentate), consistent with crystallographic studies<sup>1</sup> (Fig. 2). 2OG was replaced with mono-chelated succinate in the ferryl intermediate. The parameters generated using the MCPB tool are reported to be accurate for describing mononuclear non-heme iron centers and iron-sulfur Rieske clusters.<sup>5</sup> The zinc-binding region in KDM4A was described using the Zinc AMBER force field (ZAFF).<sup>6</sup>

The FF14SB force field was employed in MD simulations.<sup>7</sup> The protein was immersed in a rectangular box with TIP3P (transferable intermolecular potential with 3 points model) water molecules.<sup>8</sup> The edge of the box was 10 Å from the protein surface. MD simulations were performed under periodic boundary conditions. The Particle Mesh Ewald (PME) method with a direct space and Van der Waals (vdW) cut-off of 8 Å was used to calculate long-range electrostatic interactions.<sup>9</sup> Initial energy minimizations were done in two steps, i.e. the steepest descent (5000 steps), followed by the conjugate gradient method (5000 steps). In the first minimization, only the solvent and ions were allowed to minimize while the solute molecules were restrained using a potential of 500 kcal/mol Å<sup>2</sup>. This was followed by full minimization of the entire protein and solvents with steepest descent (5000 steps) and conjugate gradient (5000 steps). Energy minimization steps were performed with the CPU version of the Amber16 code (SANDER). The minimized system was annealed from 0 to 300 K in an NVT ensemble for 300 ps. A subsequent run for 750 ps in the NPT ensemble at a constant temperature of 300 K and pressure of 1.0 atm.

was carried out using Langevin-thermostat<sup>10</sup> and Barendsen barostat<sup>11</sup> with a pressure relaxation time of 1 ps. The systems were then equilibrated for ~3 ns. All bonds with hydrogen were constrained with the SHAKE algorithm.<sup>12</sup> The final production MD run for 1 $\mu$ s (1000 ns) was performed in an NPT ensemble. The target pressure was set at 1 bar with a constant pressure coupling of 2ps. The final productive molecular dynamics simulations were conducted using the GPU version of the Amber16 code (PMEMD).<sup>2</sup> Detailed analyses of the trajectories were performed with the inbuilt amber analyzing tool CPPTRAJ,<sup>13</sup> Visual Molecular Dynamics (VMD),<sup>14</sup> and other software packages that enable protein structure analysis such as UCSF Chimera,<sup>15</sup> and R (Bio3D).<sup>16</sup> Principal Component Analysis (PCA) and dynamics cross-correlation analysis (DCCA) were added to the analysis with the Bio3D package.<sup>16</sup> The PCA analysis helps to understand the details of protein motion while DCCA analysis provides all correlated motions of residues during the dynamics.

**2. QM/MM Calculations:** The Quantum Mechanical (QM) region in the hybrid Quantum Mechanical/Molecular Mechanics (QM/MM) calculation included the Fe, O<sub>2</sub>, His276, His188, Glu190, tri methylated lysine (M3L) of H3(7-12)K9me3 substrate, 2OG, and two water molecules as shown in Fig. 2 for the Fe(III)-superoxo complex. For the Fe(IV)-oxo complex, 2OG and O<sub>2</sub> were replaced with succinate and an oxygen atom, respectively. The consistency of the results was validated by calculations with an expanded QM region that additionally included Lys241, Tyr177, and Asn290. QM/MM calculations were performed with the ChemShell suite of programs.<sup>17,18</sup> Turbomole was used for the QM region,<sup>19</sup> while DL\_POLY for the MM region.<sup>20</sup> Amber force fields generated for the MD simulation were used in the QM/MM step. The polarizing effect of the protein on the QM region was accounted with the electronic embedding scheme.<sup>21</sup> All geometries were optimized using the B3LYP<sup>22</sup> density functional theory with the def2-SVP (Split

valence polarization) basis set (B1) which can reproduce accurate barriers and electronic structure for Fe metal containing systems.<sup>23,24</sup> Transition states were optimized in two steps. First, a relaxed potential energy surface (adiabatic mapping) scan was performed by gradually changing a reaction coordinate<sup>24</sup> The highest energy point on the scanned surface was reoptimized for the TS. The DL-find optimizer algorithm implemented in Chemshell was used for reactant optimization and scanning.<sup>25</sup> The HDLC (hybrid delocalized coordinates) optimizer was used for the final TS optimization.<sup>26</sup> The initial guesstimate of the TS obtained from potential energy surface (PES) scanning was very close to the final TS, showing only small geometric and energy differences. Frequency calculations were performed to verify the first order and second-order saddle points. Further single points were calculated to refine the energies with higher basis sets at the B3LYP/def2-TZVP level of theory (B2).<sup>23,24</sup>

## **QM/MM results on Oxygen Activation by KDM4A with H3(7-12)K9me3 Substrate**

We carried out QM/MM reaction modeling studies to investigate the detailed mechanism of oxygen activation by the catalytic domain of KDM4A (**RC1** to **IM2**, Figure 2). Following binding of O<sub>2</sub> to give a superoxide complex (**RC1**), a succinyl peroxide intermediate (**IM1**) is formed, concomitant with decarboxylation of 2OG; homolytic O-O bond-breaking of **IM1** generates a ferryl intermediate (**IM2**) (Figure 2). The energies of possible spin states of **RC1**, i.e. singlet, triplet, quintet and septet states were calculated. Calculations were done by single point calculations on the quintet optimized geometry at the B2 level of theory. Both the singlet and triplet energies of **RC1** are higher than that of the quintet state of **RC1**, by 19.8 and 23.8 kcal/mol, respectively. The septet energy of **RC1** is close to that of the quintet state by -0.5 kcal/mol.

However, the subsequent potential septet of **TS1** is higher in energy than that for the quintet state of **TS1** by 2.3 kcal/mol. Thus, the possibility of O<sub>2</sub> activation through possible spin states other than the quintet state seems unlikely. The decarboxylation step on going from **RC1** to **IM1** has a barrier 12.1 kcal/mol at the QM(B2+ZPE)/MM level of theory. The stabilizing interactions of the C5 carboxylate oxygens of 2OG with Tyr132 and Lys206, as well as the 2OG O1 oxygen with Asn198, remains conserved at the decarboxylation transition state (**TS1** in Figure S2). **RC1** and **TS1** are stabilized by interactions with Tyr177, Lys241, and Asn290. Overall, the O<sub>2</sub> activation mechanism for KDM4A resembles that established for other 2OG oxygenases.<sup>4</sup>

The results of QM/MM reaction modelling studies concerning the mechanism of oxygen reaction of the KDM4A.Fe.superoxo.H3(7-12)K9me3 complex (**RC1**) are summarized in Figure S2. In the first step, the distal oxygen (Od) of the superoxo complex (**RC1**) approaches the C2 ketone carbonyl of 2OG. C2-Od bond formation, as shown in Figure S2a, causes 2OG C1-C2 carbonyl bond elongation, eventually leading to decarboxylation and formation of a succinyl peroxide intermediate **IM1**, for which there is experimental evidence in some cases.<sup>27</sup> This observation implies that in the case of KDM4A, 2OG decarboxylation is a near concerted process with C2–Od bond formation. Non-heme enzymes generally have a high spin quintet ground state for their iron cofactor.<sup>4a,b</sup> Transition state (**TS1**) manifests near simultaneous C2–Od bond formation and CO<sub>2</sub> departure. The barrier for decarboxylation to give **IM1** is 12.1 kcal/mol at the QM(B2+ZPE)/MM level of theory, which together with the reasonable thermodynamic stability of the following intermediate, **IM1**, suggests efficient oxygen activation.

These observations agree with previous studies on model complexes and some other 2OG dependent oxygenases.<sup>4a,b</sup> Decarboxylation is the rate-determining step (RDS) during oxygen activation from **RC1** to give **IM1**. Exothermic (-36.4 kcal/mol) decarboxylation of **RC1** leads to

the formation of succinyl peroxide intermediate **IM1**. The transition state, **TS1** has elongated Fe-Op and C1-C2 bonds (2.07 and 1.73 Å, respectively) relative to **RC1**.

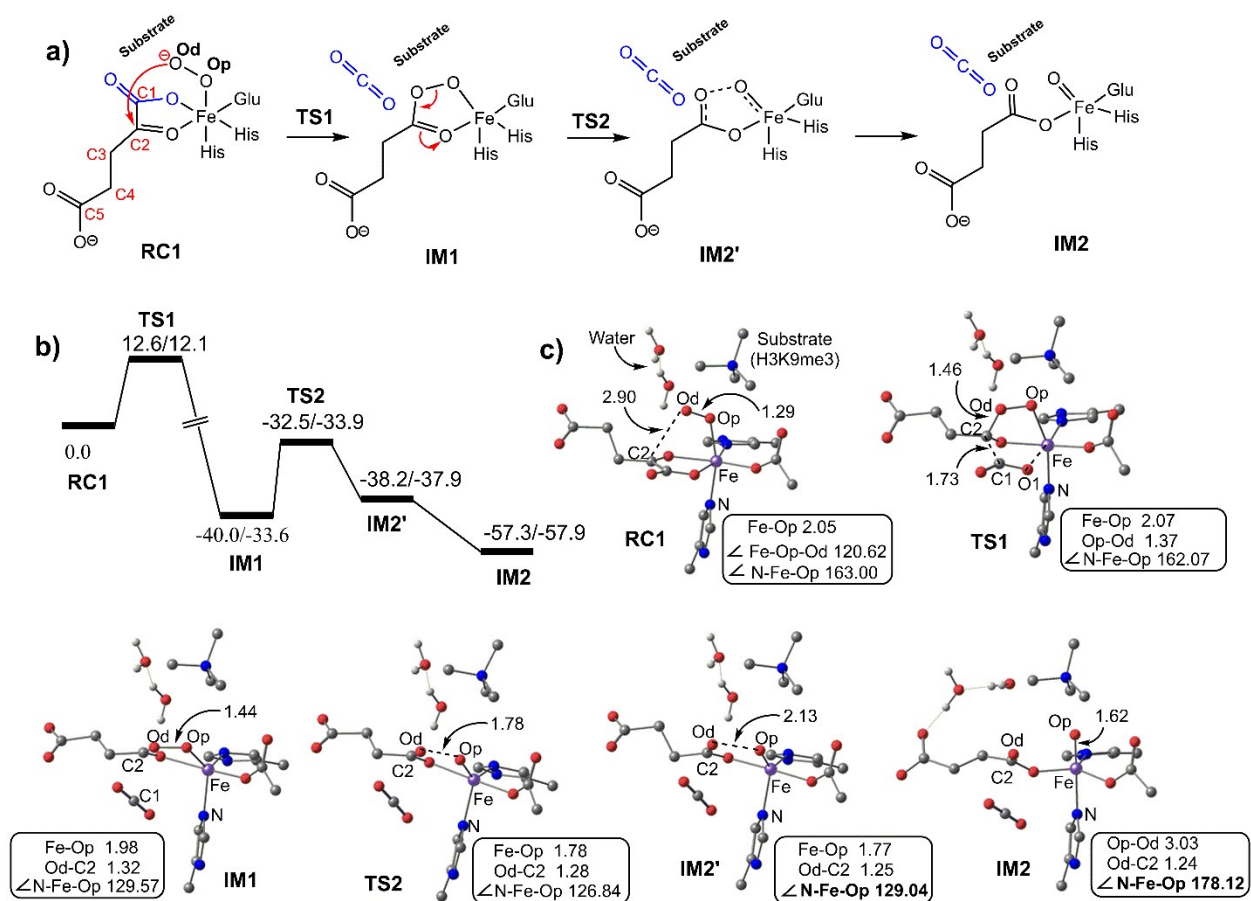

**Figure S2.** The QM/MM modeled oxygen activation step in KDM4A catalysis. **(a)** Mechanism for 2OG dependent oxygen activation. **(b)** Potential energy profile (in kcal/mol) at the QM(B2)/MM followed by QM(B2+ZPE)/MM level of theory. **(c)** The QM region of QM(B1)/MM optimized geometries.

A network of hydrogen bonds formed by water molecules and residues with polar side chains (Tyr177, Lys241, Asn198, and Tyr132) around 2OG contribute to O<sub>2</sub> activation (Figure



S5). Figure S1c shows the interactions of two water molecules that were included in the QM region. O-O homolysis of the peroxide **IM1** has a barrier of 7.5 kcal/mol at the QM(B2)/MM level of theory. The addition of zero point energy (ZPE) correction predicts barrier-less homolysis. After homolysis, the resulting transient intermediate, **IM2'**, has a partial bond (2.13 Å) between the oxygen (Op-Od) atoms; the Fe-Op bond distance in **IM2'** is 1.77 Å. Rearrangement of **IM2'** gives the ferryl-oxo intermediate **IM2** [Fe(IV)-oxo], which has an Fe-O distance of 1.61 Å and which is stabilized by around -57 kcal/mol relative to the initial reactant complex **RC1**. CO<sub>2</sub> is assumed to exit the active site. The results suggest that following after the first decarboxylation step, the low energy barrier to homolysis of **IM1** and succeeding exothermic steps may minimize side reactions sometimes associated with radical intermediates (Figure S2).

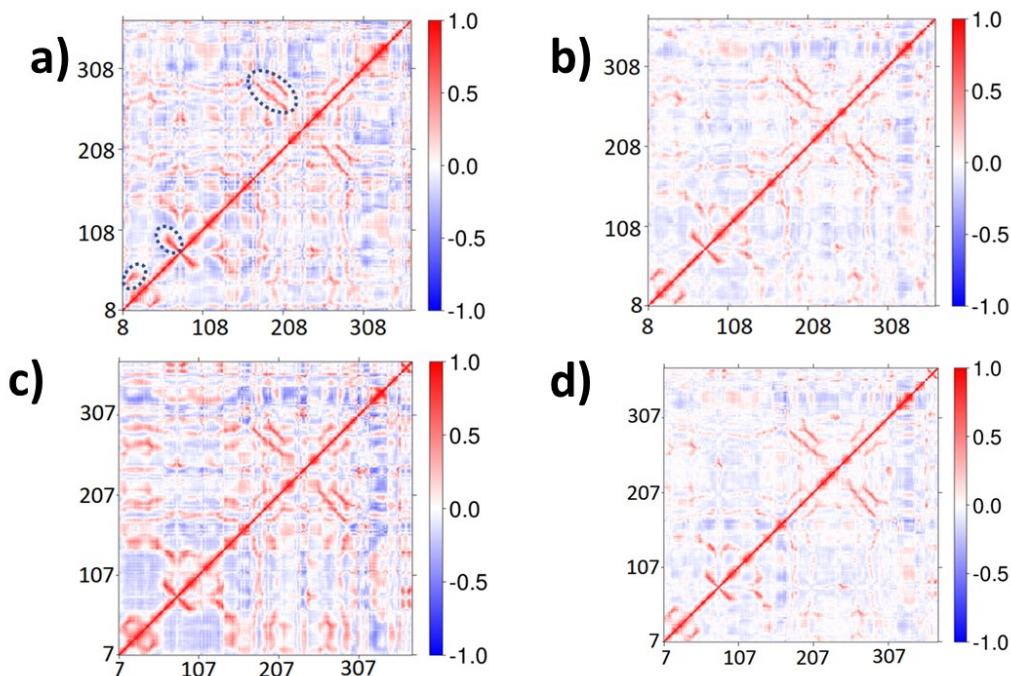

**Figure S3.** Dynamic cross correlation diagram of the (a) Fe(III)-O<sub>2</sub>/2OG, (RC1) (b) Fe(IV)-oxo/succinate (IM2) complexes with H3(7-12)K9me3 substrate, (c) the RC1 (and) the (d) IM2 complex with the cyclic peptide CP2. Note that in addition to those described in the main text, there are correlated motions between residues 47-50 (belonging to  $\beta$ 2 and  $\beta$ 3) and 16-22 ( $\beta$ 1 and the following loop) and residues 81-98 ( $\beta$ 5) with 63-77 (loop between  $\beta$ 2 and  $\beta$ 3).  $\beta$ 1 and  $\beta$ 2 are located relatively distant from the active site. The DSBH  $\beta$ 3 helps form the substrate-binding cavity as does  $\beta$ 5.

### Details of Correlated motions in the CP2(R6Kme3) bound complex

The correlated motions involving Lys 241 and Asn290, which are predicted to be important in orienting the substrate, may differ in the Fe(III)-superoxo complex (RC1) and the Fe(IV)-oxo complex (IM2). Long-range correlated interactions in the Fe(III)-superoxo (RC1) complex therefore could help promote oxygen activation. In the Fe(IV)-oxo (IM2) complex specific

correlated motions might regulate hydrogen atom transfer. In the Fe(III)-superoxo complex (**RC1**), Lys241 motion correlates with residues 83-84 in  $\beta_4$  (which extends DSBH) and Ala186 which is close to the Fe-coordinating His188. In the Fe(IV)-oxo complex (**IM2**), correlation of Lys241 with the  $\beta_4$  strand is decreased while the correlation of Lys241 with Ala186 persists. In the Fe(III)-O<sub>2</sub> (**RC1**) complex, Asn290 shows additional correlations with residues; 31-45 ( $\alpha_2$ , 3.10H1, and  $\beta_2$ ), 148-155 (the loop connecting  $\beta_5$  to  $\alpha_5$ ), 175 (on  $\beta_7$ ), 188-198 ( $\beta_9$  with the preceding loop), 269-273 ( $\beta_{13}$ ), 356-358 (Zn-binding region; Fe and succinate binding). It is interesting that  $\alpha_2$ ,  $\alpha_5$ , 3.10H1, and  $\beta_2$  are distant from the substrate binding pocket.  $\beta_5$  is close to the Zn binding region, while  $\beta_7$ ,  $\beta_9$ , and  $\beta_{13}$  belong to the DSBH. The cross correlations of Asn290 in the Fe(IV)-oxo complex (**IM2**) were reduced to residues 194-196 that belong to  $\beta_9$  and the preceding loop. Thus, correlated motions of Asn290 may be important in the reaction of Fe(III)-O<sub>2</sub> (**RC1**) to give **IM1** then **IM2**.

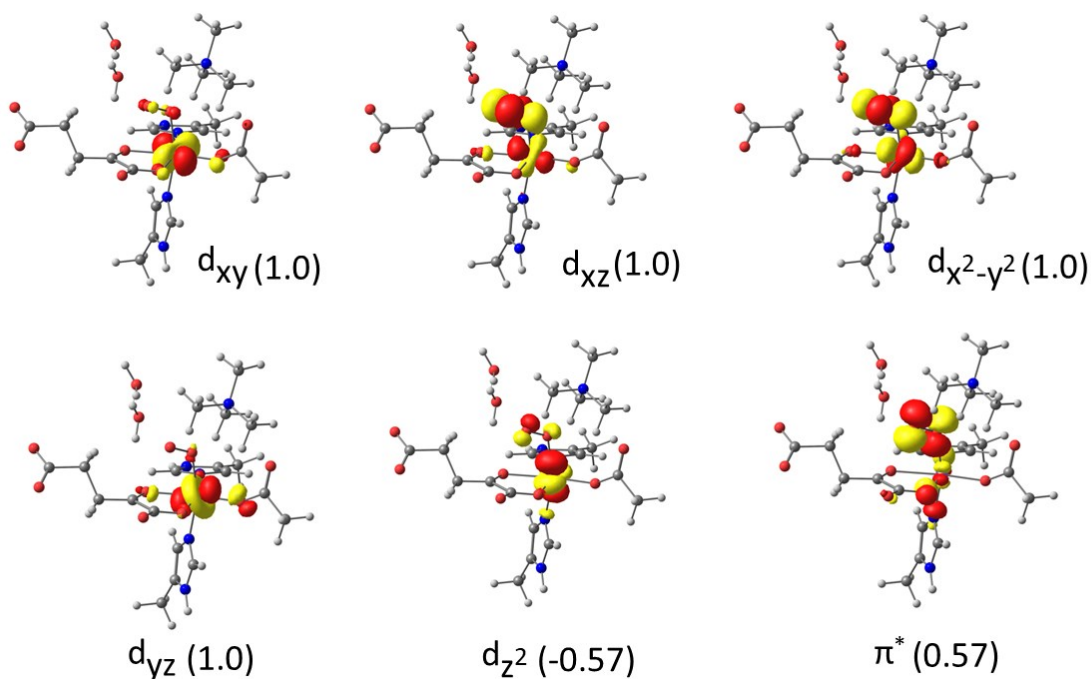

**Figure S4.** Spin Natural Orbitals (SNO) for the Fe-superoxide complex (**RC1**).

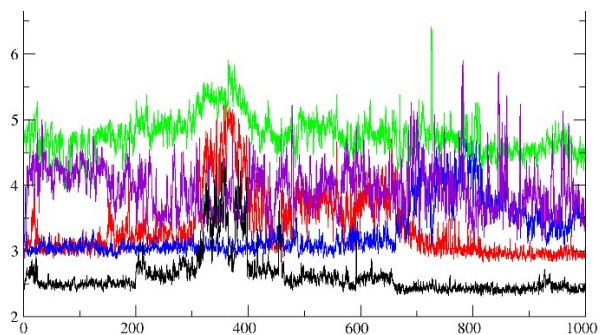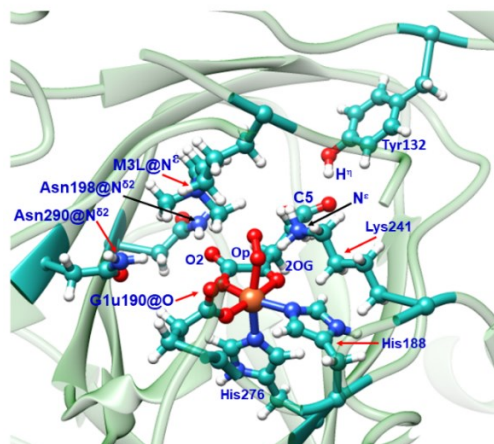

**Figure S5.** Distance plots for the Fe(III)-O<sub>2</sub>.H3(7-12)K9me3 complex. Color code: 2OG@C5-Tyr132@H<sup>n</sup> distance in black; dioxygen Op-Lys241@N<sup>ε</sup> in violet; Glu190@O(noncoordinating)-M3L@N<sup>ε</sup> in green; Glu190@O(non-coordinating O)-Asn290@N<sup>δ2</sup> in blue; Asn198@N<sup>δ2</sup>-O2@2OG in red.

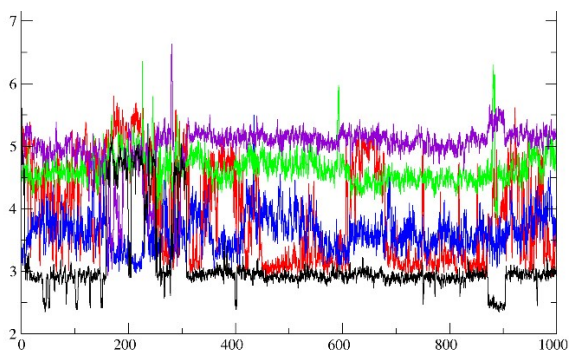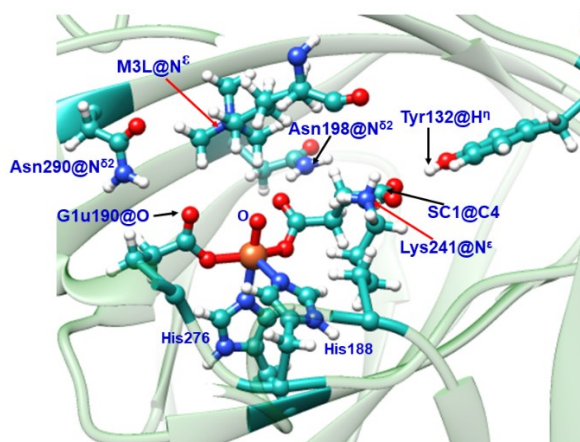

**Figure S6.** Distance plots for the Fe(IV)-oxo.succinate.H3(7-12)K9me3 complex. Color code: SC1@C4-Tyr132@H<sup>n</sup> in black; O-Lys241@N<sup>ε</sup> in violet; Glu190@O(noncoordinating)-M3L@N<sup>ε</sup> in green; Glu190@O(non-coordinating O)-Asn290@N<sup>δ2</sup> in blue; Asn198@N<sup>δ2</sup>-O2@SC1 in red. SC, succinate.

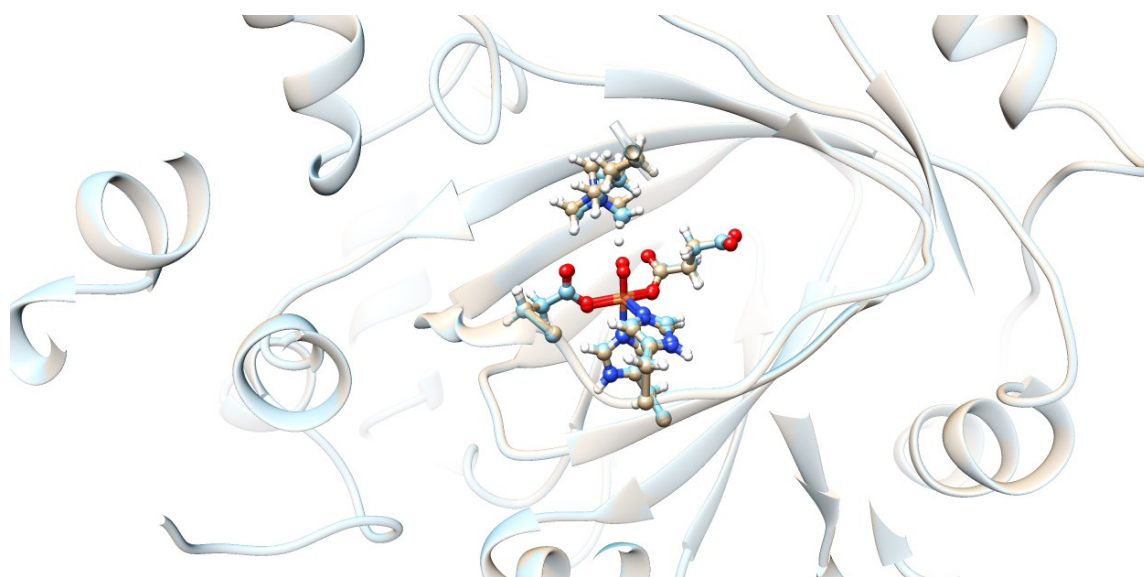

**Figure S7.** Superimposed geometries of the optimized reactant with the HAT transition state for the KDM4A.Fe(IV)-oxo.succinate.H3(7-12)K9me3 (**IM2**) complex.

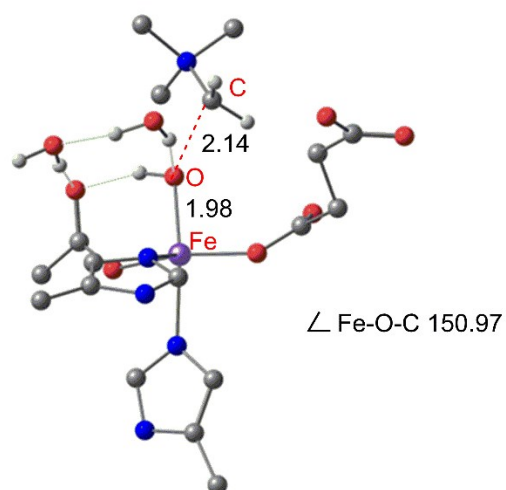

**Figure S8.** The QM region of QM(B1)/MM optimized geometry of the rebound step for the KDM4A.Fe(IV)-oxo.H3(7-12)K9me3 complex.

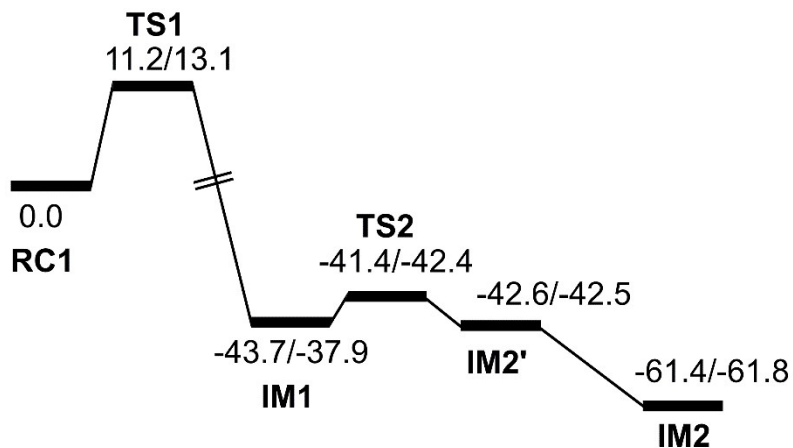

**Figure S9.** Potential energy profile (in kcal/mol) at the QM(B2)/MM level of theory followed by the QM(B2+ZPE)/MM level of theory for O<sub>2</sub> activation in the presence of the cyclicpeptide, CP2, bound complex.

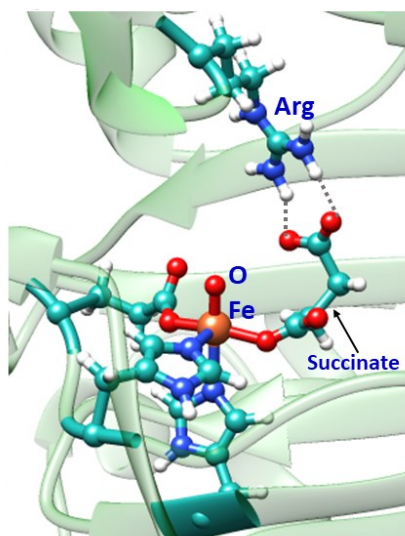

**Figure S10.** The hydrogen-bonding interaction of CP2-Arg at the active site of KDM4A.

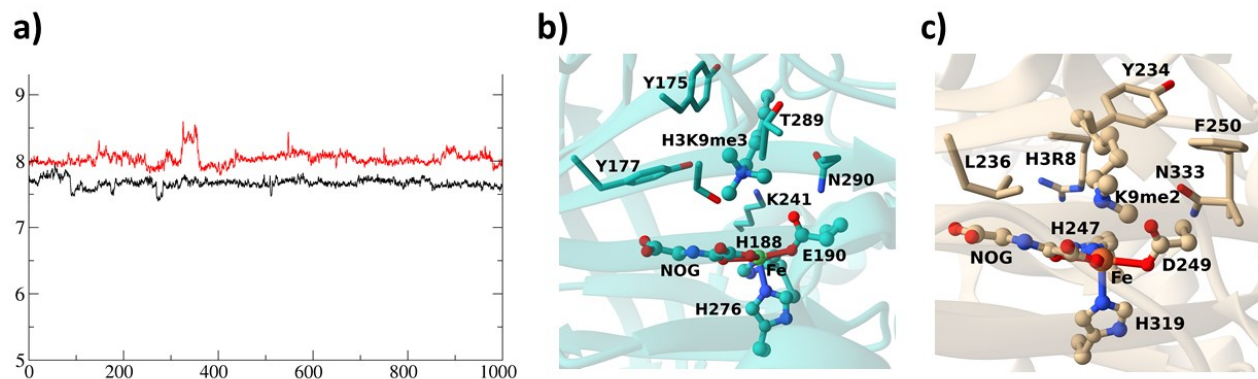

**Figure S11.** Comparison of active site details of KDM4A and PHF8 enzymes. **a)** Radii of gyration of the Fe(IV)-oxo active site in KDM4A (red) and PHF8 (black). The y-axis is labeled with the radius of gyration in Å and x-axis with time in ns. **b)** Active site geometry of KDM4A (based PDB: 2OQ6) and **c)** PHF8 (based PDB ID: 3KV4).

**Table S1.** Mulliken spin densities of intermediates and transition states for the O<sub>2</sub> activation pathway in Figure S1.

|             | Fe  | Op   | Od   |
|-------------|-----|------|------|
| <b>RC1</b>  | 4.2 | -0.2 | -0.5 |
| <b>TS1</b>  | 4.2 | -0.1 | -0.2 |
| <b>IM1</b>  | 3.8 | 0.1  | 0.0  |
| <b>TS2</b>  | 3.9 | 0.1  | -0.2 |
| <b>IM2'</b> | 4.1 | -0.2 | -0.3 |
| <b>IM2</b>  | 3.1 | 0.6  | 0.1  |

**Table S2.** Mulliken charges of intermediates and transition states in the O<sub>2</sub> activation pathway in

Figure S1.

|             | <b>Fe</b> | <b>Op</b> | <b>Od</b> |
|-------------|-----------|-----------|-----------|
| <b>RC1</b>  | 0.7       | -0.2      | -0.2      |
| <b>TS1</b>  | 0.6       | -0.4      | -0.1      |
| <b>IM1</b>  | 0.7       | -0.5      | -0.2      |
| <b>TS2</b>  | 0.7       | -0.5      | -0.3      |
| <b>IM2'</b> | 0.8       | -0.6      | -0.4      |
| <b>IM2</b>  | 0.6       | -0.5      | -0.5      |

**Table S3.** Mulliken spin densities of intermediates and transition states for the hydroxylation step shown in Figure 6.

|               | <b>Fe</b> | <b>O</b> | <b>Substrate</b> | <b>Rest</b> |
|---------------|-----------|----------|------------------|-------------|
| <b>IM2</b>    | 3.2       | 0.6      | 0                | 0.2         |
| <b>TS_HAT</b> | 4.0       | 0.1      | -0.5             | 0.4         |
| <b>IM3</b>    | 4.2       | 0.3      | -1.0             | 0.5         |
| <b>TS_Rb</b>  | 4.1       | 0.1      | -0.6             | 0.4         |
| <b>PD</b>     | 3.8       | 0.0      | 0.0              | 0.2         |



**Table S4.** Mulliken charges of intermediates and transition states in the hydroxylation step shown in Figure 6.

|               | <b>Fe</b> | <b>O</b> | <b>Substrate</b> | <b>Rest</b> |
|---------------|-----------|----------|------------------|-------------|
| <b>IM2</b>    | 0.7       | -0.6     | 0.9              | -1.1        |
| <b>TS_HAT</b> | 0.8       | -0.6     | 1.1              | -1.3        |
| <b>IM3</b>    | 0.7       | -0.7     | 1.3              | -1.3        |
| <b>TS_Rb</b>  | 0.7       | -0.7     | 1.4              | -1.4        |
| <b>PD</b>     | 0.8       | -0.4     | 1.4              | -1.8        |

**Table S5.** Mulliken Spin Densities of multiple hydrogen atom transfer (HAT) trajectories shown in Figure 6.

| <b>Entry<sup>a</sup></b> | <b>Barrier</b> |               | <b>Fe</b> | <b>O</b> | <b>Substrate</b> | <b>Rest</b> |
|--------------------------|----------------|---------------|-----------|----------|------------------|-------------|
| <b>2</b>                 | 23.2           | <b>IM2</b>    | 3.1       | 0.6      | 0.0              | 0.3         |
|                          |                | <b>TS_HAT</b> | 4.0       | 0.1      | -0.5             | 0.4         |
| <b>3</b>                 | 27.3           | <b>IM2</b>    | 3.1       | 0.7      | 0.0              | 0.2         |
|                          |                | <b>TS_HAT</b> | 4.0       | 0.0      | -0.4             | 0.4         |
| <b>4</b>                 | 28.3           | <b>IM2</b>    | 3.1       | 0.6      | 0.0              | 0.3         |
|                          |                | <b>TS_HAT</b> | 4.0       | 0.1      | -0.5             | 0.4         |
| <b>5</b>                 | 26.1           | <b>IM2</b>    | 3.1       | 0.6      | 0.0              | 0.3         |
|                          |                | <b>TS_HAT</b> | 4.0       | 0.0      | -0.5             | 0.5         |

<sup>a</sup>- entry 1 is in **Table S3**.

**Table S6.** Mulliken charges of multiple hydrogen atom transfer (HAT) shown in Figure 6.

| <b>Entry<sup>a</sup></b> | <b>Barrier</b> |               | <b>Fe</b> | <b>O</b> | <b>Substrate</b> | <b>Rest</b> |
|--------------------------|----------------|---------------|-----------|----------|------------------|-------------|
| <b>2</b>                 | 23.2           | <b>IM2</b>    | 0.6       | -0.5     | 0.9              | -1.0        |
|                          |                | <b>TS_HAT</b> | 0.7       | -0.6     | 1.1              | -1.2        |
| <b>3</b>                 | 27.3           | <b>IM2</b>    | 0.7       | -0.5     | 0.9              | -1.1        |
|                          |                | <b>TS_HAT</b> | 0.8       | -0.6     | 1.1              | -1.3        |
| <b>4</b>                 | 28.3           | <b>IM2</b>    | 0.6       | -0.5     | 0.9              | -1.0        |
|                          |                | <b>TS_HAT</b> | 0.8       | -0.7     | 1.1              | -1.2        |
| <b>5</b>                 | 26.1           | <b>IM2</b>    | 0.7       | -0.5     | 0.9              | -1.1        |
|                          |                | <b>TS_HAT</b> | 0.8       | -0.6     | 1.1              | -1.3        |

-a- entry **1** is in **Table S3**.

**Table S7.** Mulliken Spin Densities of multiple hydrogen atom transfer (HAT) trajectories shown in Figure 9.

| <b>Entry</b> | <b>Barrier</b> |               | <b>Fe</b> | <b>O</b> | <b>Substrate</b> | <b>Rest</b> |
|--------------|----------------|---------------|-----------|----------|------------------|-------------|
| <b>1</b>     | 20.6           | <b>IM2</b>    | 3.2       | 0.5      | 0.0              | 0.3         |
|              |                | <b>TS_HAT</b> | 4.1       | -0.2     | -0.4             | 0.5         |
| <b>2</b>     | 19.8           | <b>IM2</b>    | 3.1       | 0.6      | 0.0              | 0.3         |
|              |                | <b>TS_HAT</b> | 4.0       | -0.1     | -0.4             | 0.5         |
| <b>3</b>     | 21.1           | <b>IM2</b>    | 3.1       | 0.6      | 0.0              | 0.3         |
|              |                | <b>TS_HAT</b> | 4.0       | -0.1     | -0.4             | 0.5         |
| <b>4</b>     | 31.8           | <b>IM2</b>    | 3.1       | 0.6      | 0.0              | 0.3         |
|              |                | <b>TS_HAT</b> | 3.9       | 0.1      | -0.4             | 0.4         |
| <b>5</b>     | 29.0           | <b>IM2</b>    | 3.1       | 0.6      | 0.0              | 0.3         |
|              |                | <b>TS_HAT</b> | 4.1       | -0.1     | -0.4             | 0.4         |

**Table S8.** Mulliken charges of multiple hydrogen atom transfer (HAT) trajectories shown in Figure 9.

| <b>Entry</b> | <b>Barrier</b> |               | <b>Fe</b> | <b>O</b> | <b>Substrate</b> | <b>Rest</b> |
|--------------|----------------|---------------|-----------|----------|------------------|-------------|
| <b>1</b>     | 20.6           | <b>IM2</b>    | 0.8       | -0.6     | 0.9              | -1.1        |
|              |                | <b>TS_HAT</b> | 0.8       | -0.6     | 1.0              | -1.3        |
| <b>2</b>     | 19.8           | <b>IM2</b>    | 0.7       | -0.5     | 0.9              | -1.1        |
|              |                | <b>TS_HAT</b> | 0.8       | -0.7     | 1.0              | -1.1        |
| <b>3</b>     | 21.1           | <b>IM2</b>    | 0.7       | -0.5     | 0.9              | -1.1        |
|              |                | <b>TS_HAT</b> | 0.8       | -0.7     | 1.1              | -1.2        |
| <b>4</b>     | 31.8           | <b>IM2</b>    | 0.6       | -0.4     | 0.9              | -1.1        |
|              |                | <b>TS_HAT</b> | 0.8       | -0.6     | 1.1              | -1.3        |
| <b>5</b>     | 29.0           | <b>IM2</b>    | 0.6       | -0.5     | 0.9              | -1.0        |
|              |                | <b>TS_HAT</b> | 0.8       | -0.8     | 1.1              | -1.1        |

The Cartesian Coordinates of the Optimized QM Region of QM/MM Geometry. QM/MM energies at the QM(B2)/MM level of theory are given in Hartree.

### O<sub>2</sub> Activation step

| RC1                         |              |              |              | TS1                         |              |              |              |
|-----------------------------|--------------|--------------|--------------|-----------------------------|--------------|--------------|--------------|
| QM/MM Energy = -3208.879920 |              |              |              | QM/MM Energy = -3208.859902 |              |              |              |
| 6                           | 39.044965236 | 29.442057704 | 33.081114753 | 6                           | 39.097245779 | 29.399493427 | 33.073377732 |
| 1                           | 37.966791579 | 29.627519915 | 33.199621246 | 1                           | 38.019473889 | 29.578674584 | 33.203593108 |
| 1                           | 39.148522467 | 28.372432397 | 32.853650802 | 1                           | 39.204067985 | 28.331387648 | 32.838915300 |
| 6                           | 39.741122662 | 29.792340070 | 34.352999685 | 6                           | 39.800203000 | 29.747278886 | 34.342027867 |
| 7                           | 40.960447503 | 29.270094905 | 34.733870591 | 7                           | 41.042662645 | 29.260780761 | 34.699077372 |
| 1                           | 41.574269193 | 28.666730890 | 34.173626351 | 1                           | 41.666692132 | 28.681423464 | 34.124453931 |
| 6                           | 41.333164587 | 29.842784050 | 35.889577081 | 6                           | 41.405106218 | 29.818723540 | 35.864225681 |
| 1                           | 42.260693594 | 29.628467385 | 36.409762429 | 1                           | 42.349390940 | 29.639721821 | 36.368000544 |
| 7                           | 40.412079821 | 30.709294274 | 36.288680816 | 7                           | 40.456143389 | 30.640557091 | 36.292825354 |
| 6                           | 39.407572918 | 30.682817626 | 35.346684580 | 6                           | 39.444490614 | 30.602082476 | 35.358670084 |
| 1                           | 38.529774745 | 31.317201651 | 35.430794774 | 1                           | 38.548842346 | 31.207435034 | 35.464473233 |
| 6                           | 37.685431920 | 35.208161851 | 37.506341151 | 6                           | 37.796247557 | 35.089935271 | 37.507393013 |
| 1                           | 38.426175000 | 35.668934908 | 36.840520219 | 1                           | 38.547846725 | 35.483206769 | 36.810779949 |
| 1                           | 37.722318966 | 35.694229824 | 38.492512967 | 1                           | 37.888691362 | 35.605427790 | 38.474928651 |
| 6                           | 38.018960158 | 33.735581600 | 37.741828493 | 6                           | 38.044468121 | 33.607396646 | 37.788722853 |
| 8                           | 39.156522119 | 33.352642881 | 37.265643027 | 8                           | 39.143310309 | 33.125696121 | 37.317805209 |
| 8                           | 37.240136779 | 33.006023178 | 38.364789397 | 8                           | 37.222371373 | 32.952358816 | 38.440450049 |
| 6                           | 44.487228174 | 34.023071011 | 33.404281876 | 6                           | 44.496083288 | 34.000997054 | 33.401407427 |
| 1                           | 45.492111189 | 33.811124097 | 33.810405835 | 1                           | 45.496138048 | 33.782953939 | 33.815786361 |
| 1                           | 44.514810951 | 35.072777165 | 33.069626453 | 1                           | 44.532329035 | 35.051427318 | 33.069621801 |
| 6                           | 43.443634271 | 33.872553167 | 34.475357721 | 6                           | 43.442513452 | 33.854313639 | 34.463255992 |
| 7                           | 43.120098222 | 34.942584639 | 35.290296119 | 7                           | 43.118092455 | 34.923947021 | 35.279519313 |
| 1                           | 43.411569739 | 35.922627709 | 35.228390789 | 1                           | 43.421532543 | 35.900659254 | 35.227483229 |
| 6                           | 42.268045284 | 34.530464996 | 36.244295561 | 6                           | 42.252531771 | 34.515422010 | 36.221511094 |
| 1                           | 41.881545366 | 35.181983992 | 37.024843085 | 1                           | 41.870917196 | 35.163212525 | 37.006757298 |
| 7                           | 42.004897916 | 33.240276670 | 36.101151009 | 7                           | 41.979140399 | 33.227901246 | 36.068639259 |
| 6                           | 42.727082073 | 32.815197026 | 35.000847414 | 6                           | 42.711923008 | 32.800939832 | 34.975317887 |
| 1                           | 42.689935201 | 31.789526975 | 34.645626803 | 1                           | 42.673512492 | 31.777406885 | 34.615202424 |
| 26                          | 40.755704380 | 32.307497314 | 37.618278242 | 26                          | 40.847179251 | 32.225230482 | 37.601179017 |
| 6                           | 42.562974498 | 33.138705510 | 39.688427911 | 6                           | 42.301834876 | 33.322721702 | 39.808208055 |
| 6                           | 43.266827749 | 31.871678436 | 39.116613285 | 6                           | 42.625564604 | 31.637789760 | 39.557733784 |
| 6                           | 44.482324876 | 30.000609344 | 40.315005303 | 6                           | 44.291323280 | 29.793252271 | 40.221596030 |
| 6                           | 45.855291663 | 29.562055514 | 40.891717941 | 6                           | 45.685150250 | 29.502464271 | 40.843290099 |
| 8                           | 42.994554354 | 33.700196147 | 40.693581845 | 8                           | 42.825396914 | 33.885308038 | 40.754572391 |
| 8                           | 41.536294343 | 33.499037015 | 39.010019900 | 8                           | 41.485399430 | 33.707233639 | 38.941289676 |
| 8                           | 42.688961959 | 31.315032681 | 38.177004669 | 8                           | 42.592648059 | 31.429388323 | 38.275826748 |
| 8                           | 46.553321588 | 30.472064187 | 41.395904725 | 8                           | 46.324484697 | 30.477271609 | 41.300898888 |
| 6                           | 44.559586924 | 31.405035052 | 39.681497340 | 6                           | 43.846607244 | 31.243073576 | 40.382513259 |
| 8                           | 46.134045003 | 28.344865342 | 40.818690692 | 8                           | 46.055894704 | 28.306394685 | 40.809441113 |
| 1                           | 43.755274479 | 30.015549325 | 41.144865695 | 1                           | 43.562748709 | 29.082286835 | 40.643420091 |
| 1                           | 44.128541595 | 29.248669709 | 39.598488676 | 1                           | 44.377186045 | 29.560886831 | 39.151102513 |
| 1                           | 45.286029365 | 31.379379338 | 38.849542343 | 1                           | 44.671514860 | 31.897509636 | 40.066759010 |
| 1                           | 44.927318661 | 32.114168148 | 40.431631597 | 1                           | 43.647435294 | 31.496482284 | 41.433483845 |
| 8                           | 40.074476489 | 31.087375146 | 39.113603574 | 8                           | 40.351817306 | 31.176760126 | 39.313262547 |
| 8                           | 40.740978203 | 30.954565658 | 40.205434539 | 8                           | 41.389237917 | 31.201856701 | 40.204940901 |
| 6                           | 36.360523184 | 30.737372503 | 43.346037492 | 6                           | 36.401165003 | 30.706844479 | 43.336081614 |
| 1                           | 36.147225202 | 31.017104180 | 44.387297818 | 1                           | 36.172978910 | 31.010972482 | 44.367189829 |
| 1                           | 36.839921508 | 29.749951109 | 43.336729386 | 1                           | 36.863155887 | 29.711563734 | 43.359233400 |

|   |              |              |              |   |              |              |              |
|---|--------------|--------------|--------------|---|--------------|--------------|--------------|
| 7 | 37.390519994 | 31.711851603 | 42.817533758 | 7 | 37.457960825 | 31.653970143 | 42.810933389 |
| 6 | 38.595066481 | 31.632296921 | 43.713249084 | 6 | 38.624847068 | 31.588349608 | 43.755122843 |
| 6 | 36.862468432 | 33.119526841 | 42.795552445 | 6 | 36.946379577 | 33.066184641 | 42.726752920 |
| 6 | 37.823928248 | 31.344541419 | 41.423312408 | 6 | 37.942481817 | 31.237764891 | 41.446958735 |
| 1 | 36.509651657 | 33.381184104 | 43.801423804 | 1 | 36.569554246 | 33.364542707 | 43.713529633 |
| 1 | 37.671709126 | 33.795151480 | 42.490419773 | 1 | 37.772322718 | 33.722127645 | 42.423438649 |
| 1 | 36.040750824 | 33.167412122 | 42.062686929 | 1 | 36.142900470 | 33.100570780 | 41.971514881 |
| 1 | 38.142782121 | 30.292504483 | 41.441573034 | 1 | 38.230986549 | 30.177413363 | 41.505672571 |
| 1 | 36.973661543 | 31.497868188 | 40.747062297 | 1 | 37.129321803 | 31.386635533 | 40.726076984 |
| 1 | 38.655109842 | 31.994739171 | 41.135113620 | 1 | 38.799086599 | 31.858848454 | 41.163403388 |
| 1 | 38.961748066 | 30.596447405 | 43.716893724 | 1 | 38.985858466 | 30.550876010 | 43.795561960 |
| 1 | 39.378298118 | 32.306762070 | 43.327697753 | 1 | 39.422780805 | 32.256243894 | 43.389744008 |
| 1 | 38.294772093 | 31.910922300 | 44.731952268 | 1 | 38.285714150 | 31.888516623 | 44.755196188 |
| 8 | 40.872546135 | 28.045562875 | 41.303495116 | 8 | 40.957323452 | 28.057263508 | 41.258504456 |
| 1 | 40.925384012 | 27.253673242 | 41.883745389 | 1 | 40.981871339 | 27.253360647 | 41.826131533 |
| 1 | 41.020075989 | 28.825758501 | 41.875320225 | 1 | 41.113651873 | 28.818642035 | 41.853705272 |
| 8 | 41.599776642 | 28.171551755 | 38.737758544 | 8 | 41.605438140 | 28.144508766 | 38.653932735 |
| 1 | 41.549866565 | 28.057796818 | 39.718334009 | 1 | 41.571459389 | 28.045969358 | 39.634777223 |
| 1 | 42.117535866 | 28.983601766 | 38.635537983 | 1 | 42.162769545 | 28.926207376 | 38.527689067 |
| 1 | 36.693164506 | 35.418326776 | 37.107212863 | 1 | 36.807028633 | 35.339127013 | 37.123444168 |
| 1 | 39.412874957 | 29.976720679 | 32.205417737 | 1 | 39.452078863 | 29.940033011 | 32.195893964 |
| 1 | 44.367880268 | 33.447752654 | 32.486222956 | 1 | 44.380733613 | 33.428441447 | 32.481112987 |
| 1 | 35.431728078 | 30.669258401 | 42.779674148 | 1 | 35.479264653 | 30.643280968 | 42.758044636 |

**IM1**  
**QM/MM Energy = -3208.943626**

|    |              |              |              |
|----|--------------|--------------|--------------|
| 6  | 38.989559711 | 29.397889597 | 33.030925725 |
| 1  | 37.909437158 | 29.584348613 | 33.126516738 |
| 1  | 39.092290272 | 28.338031600 | 32.761700656 |
| 6  | 39.643674952 | 29.674567291 | 34.340601448 |
| 7  | 40.886442149 | 29.190853369 | 34.694584573 |
| 1  | 41.542752253 | 28.674357900 | 34.097268831 |
| 6  | 41.191239439 | 29.653979396 | 35.918596860 |
| 1  | 42.127954619 | 29.450740486 | 36.426545370 |
| 7  | 40.206858237 | 30.404918484 | 36.394066227 |
| 6  | 39.232044216 | 30.422888677 | 35.419560833 |
| 1  | 38.317853084 | 30.998431706 | 35.539920844 |
| 6  | 37.611744427 | 35.230268622 | 37.535777101 |
| 1  | 38.358537925 | 35.701309358 | 36.882717172 |
| 1  | 37.635869004 | 35.706065804 | 38.527418912 |
| 6  | 37.947613439 | 33.744246015 | 37.738567788 |
| 8  | 39.052547166 | 33.365042668 | 37.238630487 |
| 8  | 37.151255311 | 33.024387672 | 38.376019517 |
| 6  | 44.426725455 | 33.972770718 | 33.556315716 |
| 1  | 45.424554210 | 33.753297327 | 33.976219731 |
| 1  | 44.452146426 | 35.034424515 | 33.262168690 |
| 6  | 43.356687110 | 33.777797477 | 34.595426043 |
| 7  | 42.899456022 | 34.851372330 | 35.337983752 |
| 1  | 43.150814056 | 35.842664312 | 35.272227150 |
| 6  | 42.025192917 | 34.407657763 | 36.257364504 |
| 1  | 41.529792612 | 35.061314085 | 36.970150272 |
| 7  | 41.880348002 | 33.095297047 | 36.171797548 |
| 6  | 42.702705629 | 32.687445817 | 35.136288378 |
| 1  | 42.768161743 | 31.648270348 | 34.826059306 |
| 26 | 40.601821192 | 32.095915475 | 37.583454622 |
| 6  | 43.261831469 | 34.316476760 | 40.209867705 |
| 6  | 42.639638650 | 31.239386423 | 39.571213336 |

**TS2**  
**QM/MM Energy = -3208.931694**

|    |              |              |              |
|----|--------------|--------------|--------------|
| 6  | 38.988335433 | 29.396992705 | 33.056926765 |
| 1  | 37.906813889 | 29.577858011 | 33.145913904 |
| 1  | 39.099334145 | 28.335503059 | 32.796910745 |
| 6  | 39.632428898 | 29.687694210 | 34.368949775 |
| 7  | 40.867744878 | 29.198678752 | 34.745150787 |
| 1  | 41.525485628 | 28.668957811 | 34.160070772 |
| 6  | 41.160597711 | 29.668290042 | 35.967933166 |
| 1  | 42.087124065 | 29.461267875 | 36.492976483 |
| 7  | 40.172550554 | 30.433141840 | 36.420649193 |
| 6  | 39.211202110 | 30.451988885 | 35.431510565 |
| 1  | 38.306494776 | 31.044187821 | 35.533777366 |
| 6  | 37.674068257 | 35.155965718 | 37.461276755 |
| 1  | 38.407760325 | 35.608657105 | 36.781185833 |
| 1  | 37.755528141 | 35.620057467 | 38.455985423 |
| 6  | 37.959084652 | 33.655783709 | 37.632764163 |
| 8  | 39.000366474 | 33.218488161 | 37.034920075 |
| 8  | 37.181447763 | 32.970143913 | 38.321434201 |
| 6  | 44.402347556 | 33.982056959 | 33.622787311 |
| 1  | 45.402541680 | 33.767851787 | 34.039641932 |
| 1  | 44.422639831 | 35.043428037 | 33.327587323 |
| 6  | 43.341067216 | 33.788819694 | 34.671668769 |
| 7  | 42.897167097 | 34.866983250 | 35.416071682 |
| 1  | 43.148042067 | 35.858148366 | 35.339356808 |
| 6  | 42.035067602 | 34.432941291 | 36.349702108 |
| 1  | 41.557296076 | 35.091720636 | 37.069808080 |
| 7  | 41.886069371 | 33.120375255 | 36.272526480 |
| 6  | 42.693458050 | 32.702803662 | 35.227372086 |
| 1  | 42.754783322 | 31.661820910 | 34.922762453 |
| 26 | 40.586505696 | 32.093889028 | 37.635853457 |
| 6  | 43.287485775 | 34.317818854 | 40.255168781 |
| 6  | 42.622444189 | 31.299749888 | 39.609950497 |

|   |              |              |              |   |              |              |              |
|---|--------------|--------------|--------------|---|--------------|--------------|--------------|
| 6 | 44.432099800 | 29.615831823 | 40.306137578 | 6 | 44.416831873 | 29.605067882 | 40.278820078 |
| 6 | 45.857838255 | 29.451129008 | 40.884817443 | 6 | 45.844558573 | 29.415685483 | 40.850428621 |
| 8 | 43.385649584 | 34.272691687 | 41.367736641 | 8 | 43.392539879 | 34.285237459 | 41.415052978 |
| 8 | 43.158273307 | 34.357709346 | 39.055931397 | 8 | 43.212638681 | 34.363001934 | 39.098864230 |
| 8 | 42.365349407 | 30.803861386 | 38.452040375 | 8 | 42.328844697 | 30.878759864 | 38.465302763 |
| 8 | 46.400550609 | 30.477041491 | 41.358602068 | 8 | 46.398626356 | 30.427480231 | 41.341272455 |
| 6 | 43.943858867 | 31.061280204 | 40.291576170 | 6 | 43.971479676 | 31.061306901 | 40.252676959 |
| 8 | 46.336562253 | 28.296849836 | 40.812490460 | 8 | 46.312496721 | 28.257273982 | 40.766666038 |
| 1 | 43.739716763 | 28.961864609 | 40.861890479 | 1 | 43.718663954 | 28.980071133 | 40.860835151 |
| 1 | 44.446505148 | 29.235018994 | 39.280632070 | 1 | 44.401482309 | 29.204443567 | 39.261520130 |
| 1 | 44.693143572 | 31.664375582 | 39.748158100 | 1 | 44.702290607 | 31.636083205 | 39.656254093 |
| 1 | 43.876010089 | 31.477614188 | 41.304841655 | 1 | 43.978148563 | 31.490552064 | 41.262606802 |
| 8 | 40.536587025 | 32.251472768 | 39.559937643 | 8 | 40.375747511 | 32.434064515 | 39.369098943 |
| 8 | 41.771117727 | 31.976486075 | 40.249434717 | 8 | 41.824165174 | 32.020126815 | 40.313145784 |
| 6 | 36.350779645 | 30.670711728 | 43.270054878 | 6 | 36.368115163 | 30.663349951 | 43.262889379 |
| 1 | 36.110751899 | 30.989034550 | 44.294019147 | 1 | 36.128879918 | 30.980605524 | 44.287372908 |
| 1 | 36.794749324 | 29.667807258 | 43.311664090 | 1 | 36.808834868 | 29.658941904 | 43.303051842 |
| 7 | 37.433760703 | 31.591050629 | 42.756772526 | 7 | 37.454849363 | 31.580574221 | 42.752666656 |
| 6 | 38.574245065 | 31.499754747 | 43.731390508 | 6 | 38.593526136 | 31.483152960 | 43.729398574 |
| 6 | 36.954896732 | 33.013836544 | 42.656809488 | 6 | 36.982174274 | 33.005521746 | 42.654210080 |
| 6 | 37.936431156 | 31.161632399 | 41.401894229 | 6 | 37.956699994 | 31.153844042 | 41.396967795 |
| 1 | 36.564314841 | 33.323429307 | 43.634866641 | 1 | 36.585597720 | 33.313481267 | 43.630381885 |
| 1 | 37.802731328 | 33.648304862 | 42.369216174 | 1 | 37.835269247 | 33.636679918 | 42.374924293 |
| 1 | 36.168804892 | 33.065189296 | 41.883715686 | 1 | 36.201797368 | 33.062215622 | 41.875855483 |
| 1 | 38.204612323 | 30.096383991 | 41.476286982 | 1 | 38.246917028 | 30.094750876 | 41.474547984 |
| 1 | 37.137571608 | 31.317347672 | 40.665818581 | 1 | 37.147129470 | 31.286796227 | 40.668027791 |
| 1 | 38.806372608 | 31.770759667 | 41.118498660 | 1 | 38.809466877 | 31.781448926 | 41.102093160 |
| 1 | 38.922680539 | 30.457865478 | 43.768829238 | 1 | 38.933690633 | 30.438668896 | 43.770010292 |
| 1 | 39.384386302 | 32.168429734 | 43.398355712 | 1 | 39.408394439 | 32.145849095 | 43.395755658 |
| 1 | 38.209846738 | 31.789787690 | 44.725551461 | 1 | 38.228840618 | 31.778264882 | 44.721993020 |
| 8 | 40.911087246 | 28.023079960 | 41.310962437 | 8 | 40.908935119 | 28.009565461 | 41.308791900 |
| 1 | 40.931988583 | 27.208583123 | 41.864395499 | 1 | 40.935246304 | 27.198510213 | 41.866861496 |
| 1 | 41.099605884 | 28.768154240 | 41.917116946 | 1 | 41.108741145 | 28.758454897 | 41.907500309 |
| 8 | 41.473770972 | 28.032612262 | 38.684690840 | 8 | 41.493848126 | 28.089282955 | 38.692070941 |
| 1 | 41.516488684 | 27.936901952 | 39.662190139 | 1 | 41.534078551 | 27.963679358 | 39.666506606 |
| 1 | 41.965226704 | 28.853885923 | 38.515744431 | 1 | 41.964013544 | 28.930659149 | 38.553948948 |
| 1 | 36.626896607 | 35.447419205 | 37.122270485 | 1 | 36.679636074 | 35.401473390 | 37.088586612 |
| 1 | 39.383240142 | 29.961707598 | 32.185235297 | 1 | 39.380407636 | 29.955966025 | 32.207282404 |
| 1 | 44.332324584 | 33.436287198 | 32.612207020 | 1 | 44.310871198 | 33.445795280 | 32.678264782 |
| 1 | 35.434210544 | 30.609893789 | 42.683309976 | 1 | 35.451386447 | 30.605975930 | 42.676046981 |

**IM2'**  
**QM/MM Energy = -3208.940826**

|   |              |              |              |
|---|--------------|--------------|--------------|
| 6 | 38.944925960 | 29.439361154 | 33.068552953 |
| 1 | 37.866208949 | 29.639539959 | 33.148690751 |
| 1 | 39.042483845 | 28.374574316 | 32.817944620 |
| 6 | 39.591013079 | 29.730401804 | 34.379973310 |
| 7 | 40.814828412 | 29.212348014 | 34.754552918 |
| 1 | 41.459983216 | 28.665856292 | 34.170766286 |
| 6 | 41.130568225 | 29.685837391 | 35.967568119 |
| 1 | 42.057611786 | 29.467048427 | 36.485482148 |
| 7 | 40.165824759 | 30.483348934 | 36.419580286 |
| 6 | 39.196644687 | 30.517046090 | 35.436911295 |
| 1 | 38.307383334 | 31.131139962 | 35.540497805 |
| 6 | 37.711722218 | 35.128929904 | 37.462880210 |
| 1 | 38.444195195 | 35.573526017 | 36.776326727 |
| 1 | 37.805028815 | 35.597047739 | 38.454739755 |

**IM2**  
**QM/MM Energy = -3208.971165**

|   |              |              |              |
|---|--------------|--------------|--------------|
| 6 | 38.928090974 | 29.394914440 | 33.000292221 |
| 1 | 37.844608944 | 29.571630923 | 33.066476409 |
| 1 | 39.051567881 | 28.332765249 | 32.753249092 |
| 6 | 39.547865691 | 29.710417129 | 34.316780915 |
| 7 | 40.761198769 | 29.215665887 | 34.746956160 |
| 1 | 41.430462566 | 28.664308020 | 34.196996988 |
| 6 | 41.043999563 | 29.749898334 | 35.949568975 |
| 1 | 41.951161888 | 29.557187633 | 36.516999103 |
| 7 | 40.062857043 | 30.558030190 | 36.321090277 |
| 6 | 39.119013638 | 30.540832263 | 35.325036282 |
| 1 | 38.206454378 | 31.126554842 | 35.385954818 |
| 6 | 37.559622061 | 35.332765218 | 37.532955798 |
| 1 | 38.304396170 | 35.810057479 | 36.883181711 |
| 1 | 37.549701850 | 35.838522664 | 38.509079803 |

|    |              |              |              |    |              |              |              |
|----|--------------|--------------|--------------|----|--------------|--------------|--------------|
| 6  | 37.991727485 | 33.631893584 | 37.648882383 | 6  | 37.944558012 | 33.876841768 | 37.808232427 |
| 8  | 39.064194013 | 33.197919507 | 37.092667595 | 8  | 39.165967372 | 33.608428510 | 37.474308110 |
| 8  | 37.198938537 | 32.941666139 | 38.308521610 | 8  | 37.142970936 | 33.093236738 | 38.321171915 |
| 6  | 44.394958574 | 33.990296333 | 33.635588352 | 6  | 44.211289327 | 33.997047608 | 33.782778723 |
| 1  | 45.396776442 | 33.782991622 | 34.051895571 | 1  | 45.192704268 | 33.810932927 | 34.254358421 |
| 1  | 44.411357587 | 35.050243893 | 33.334513295 | 1  | 44.215826276 | 35.063668283 | 33.503635872 |
| 6  | 43.336523615 | 33.801866014 | 34.688965250 | 6  | 43.100483637 | 33.765213410 | 34.773010414 |
| 7  | 42.894343683 | 34.885746652 | 35.426594747 | 7  | 42.690112899 | 34.808061194 | 35.583183550 |
| 1  | 43.144952513 | 35.876574821 | 35.341279642 | 1  | 42.987881868 | 35.790379599 | 35.568980263 |
| 6  | 42.037885392 | 34.460731685 | 36.368553608 | 6  | 41.755958703 | 34.361759129 | 36.438430442 |
| 1  | 41.567834895 | 35.125125977 | 37.088587273 | 1  | 41.274130811 | 34.990651729 | 37.180946018 |
| 7  | 41.890266265 | 33.147202477 | 36.301397993 | 7  | 41.526433713 | 33.072110225 | 36.246881296 |
| 6  | 42.694282889 | 32.719424548 | 35.257046409 | 6  | 42.363082512 | 32.682505846 | 35.213035060 |
| 1  | 42.758224673 | 31.675378230 | 34.964824106 | 1  | 42.381258269 | 31.667882964 | 34.826723630 |
| 26 | 40.646365766 | 32.096190319 | 37.696468557 | 26 | 40.313761937 | 32.059572158 | 37.716199010 |
| 6  | 43.315128783 | 34.223084522 | 40.264667285 | 6  | 43.289961166 | 34.151520612 | 40.375779854 |
| 6  | 42.857790531 | 31.230238012 | 39.364586130 | 6  | 42.335535836 | 31.239910938 | 39.642123960 |
| 6  | 44.478720242 | 29.610102855 | 40.438746491 | 6  | 44.614521015 | 30.687366449 | 40.654440837 |
| 6  | 45.949979555 | 29.404088268 | 40.867587252 | 6  | 45.609836543 | 29.585176596 | 41.062729840 |
| 8  | 43.433900204 | 34.209560058 | 41.422876043 | 8  | 43.446759369 | 34.129113385 | 41.530195957 |
| 8  | 43.225061741 | 34.274020637 | 39.108875248 | 8  | 43.157913218 | 34.202037698 | 39.224562010 |
| 8  | 42.336364348 | 30.946065468 | 38.224886797 | 8  | 41.833791665 | 31.804033946 | 40.623847729 |
| 8  | 46.525935221 | 30.422472955 | 41.320606840 | 8  | 45.256671526 | 28.374410954 | 41.034356012 |
| 6  | 44.309896406 | 30.893197539 | 39.619566769 | 6  | 43.456276077 | 30.229252879 | 39.780151500 |
| 8  | 46.426411956 | 28.251546374 | 40.752494529 | 8  | 46.734435788 | 29.995185420 | 41.449032195 |
| 1  | 43.888456253 | 29.716737955 | 41.360402441 | 1  | 44.221681040 | 31.129837212 | 41.585774528 |
| 1  | 44.096600181 | 28.726197427 | 39.912033928 | 1  | 45.198519048 | 31.478900052 | 40.158339542 |
| 1  | 44.834452393 | 30.824364681 | 38.659144326 | 1  | 43.807893293 | 29.958231364 | 38.778591856 |
| 1  | 44.770740505 | 31.700683164 | 40.207167981 | 1  | 42.987215528 | 29.337428725 | 40.216257917 |
| 8  | 40.382177607 | 32.417635620 | 39.413978169 | 8  | 39.416909282 | 31.338196028 | 38.852805991 |
| 8  | 42.215590701 | 31.775891242 | 40.291844770 | 8  | 41.975650867 | 31.467730533 | 38.417679166 |
| 6  | 36.395615161 | 30.643849643 | 43.278376645 | 6  | 36.475754907 | 30.670582810 | 43.365438754 |
| 1  | 36.156450609 | 30.972724683 | 44.299243634 | 1  | 36.261756828 | 30.944283829 | 44.408446070 |
| 1  | 36.826389699 | 29.635612125 | 43.328799373 | 1  | 36.910077853 | 29.661727430 | 43.344983974 |
| 7  | 37.492875315 | 31.545548974 | 42.763542597 | 7  | 37.551669485 | 31.604920947 | 42.867406941 |
| 6  | 38.620870910 | 31.468214672 | 43.755112529 | 6  | 38.729312193 | 31.480641627 | 43.793621901 |
| 6  | 37.030714761 | 32.970815714 | 42.627759039 | 6  | 37.096215263 | 33.037567619 | 42.829216785 |
| 6  | 38.014503396 | 31.087902476 | 41.426137087 | 6  | 38.024886129 | 31.234573725 | 41.486587285 |
| 1  | 36.628101375 | 33.303095031 | 43.593419219 | 1  | 36.746458587 | 33.322322988 | 43.830504581 |
| 1  | 37.892488399 | 33.587868751 | 42.343479829 | 1  | 37.957625044 | 33.651797136 | 42.530972742 |
| 1  | 36.255434414 | 33.017633184 | 41.843461596 | 1  | 36.281794204 | 33.123387162 | 42.092464924 |
| 1  | 38.300963398 | 30.029964039 | 41.528341762 | 1  | 38.301833275 | 30.170650335 | 41.509850832 |
| 1  | 37.217960591 | 31.209008050 | 40.680620039 | 1  | 37.213868130 | 31.427845333 | 40.773639933 |
| 1  | 38.876577797 | 31.705950806 | 41.137869490 | 1  | 38.890528703 | 31.859750103 | 41.238204216 |
| 1  | 38.956178877 | 30.423904919 | 43.826668512 | 1  | 39.099598765 | 30.447730929 | 43.758543297 |
| 1  | 39.439330914 | 32.114595453 | 43.399839742 | 1  | 39.500793089 | 32.181404377 | 43.439133846 |
| 1  | 38.248356686 | 31.795604306 | 44.734380387 | 1  | 38.401732150 | 31.720788803 | 44.813535302 |
| 8  | 40.847072087 | 28.043876911 | 41.299544670 | 8  | 43.162535173 | 26.833253898 | 40.348929104 |
| 1  | 40.878077995 | 27.232415742 | 41.855678780 | 1  | 43.043078108 | 26.272003550 | 41.131610503 |
| 1  | 41.068062174 | 28.790487298 | 41.895851890 | 1  | 43.948602888 | 27.423630930 | 40.552273098 |
| 8  | 41.466511036 | 28.137400365 | 38.701647335 | 8  | 40.841440387 | 28.189810407 | 40.433645614 |
| 1  | 41.510453713 | 28.039639387 | 39.680479875 | 1  | 41.685409327 | 27.682808527 | 40.361558988 |
| 1  | 41.890767195 | 28.995947096 | 38.528561506 | 1  | 40.927436611 | 28.689184944 | 41.264944342 |
| 1  | 36.715236140 | 35.379579708 | 37.099207988 | 1  | 36.574693716 | 35.504693223 | 37.098877178 |
| 1  | 39.353454014 | 29.983930920 | 32.217309201 | 1  | 39.337915983 | 29.956590983 | 32.160869654 |
| 1  | 44.304669548 | 33.449895420 | 32.693313413 | 1  | 44.194429692 | 33.478335834 | 32.824279290 |
| 1  | 35.480184188 | 30.592011868 | 42.688998748 | 1  | 35.547653097 | 30.646349201 | 42.794380888 |



## Hydroxylation step

| IM2<br>QM/MM Energy = -3024.059488 |              |              |              | TS_HAT<br>QM/MM Energy = -3024.018230 |              |              |              |
|------------------------------------|--------------|--------------|--------------|---------------------------------------|--------------|--------------|--------------|
| 6                                  | 44.702093616 | 45.282022276 | 42.603022997 | 6                                     | 44.694188920 | 45.197354212 | 42.465583807 |
| 1                                  | 45.320551264 | 45.788613674 | 41.848342161 | 1                                     | 45.289466493 | 45.714789574 | 41.698916545 |
| 1                                  | 45.323792226 | 45.173047408 | 43.504347205 | 1                                     | 45.335786044 | 45.099295805 | 43.355063859 |
| 6                                  | 44.272250297 | 43.965353349 | 42.040338081 | 6                                     | 44.287003204 | 43.869027653 | 41.908948545 |
| 7                                  | 43.691359477 | 42.946484983 | 42.770112243 | 7                                     | 43.753155145 | 42.827991163 | 42.647489571 |
| 1                                  | 43.499207047 | 42.949583866 | 43.780945417 | 1                                     | 43.562942632 | 42.835203717 | 43.659457042 |
| 6                                  | 43.349739626 | 41.955496897 | 41.925003249 | 6                                     | 43.467510320 | 41.812629793 | 41.811082949 |
| 1                                  | 42.848827666 | 41.038977888 | 42.224581554 | 1                                     | 43.010061009 | 40.874415411 | 42.114277171 |
| 7                                  | 43.690274256 | 42.274875592 | 40.684255942 | 7                                     | 43.798331319 | 42.134097526 | 40.564770826 |
| 6                                  | 44.273531393 | 43.518614565 | 40.737363827 | 6                                     | 44.312907065 | 43.410989543 | 40.611018753 |
| 1                                  | 44.652783070 | 44.018281895 | 39.849840636 | 1                                     | 44.668548081 | 43.922225588 | 39.721790605 |
| 6                                  | 42.720594154 | 43.913368643 | 35.512280461 | 6                                     | 42.767289442 | 43.946088037 | 35.501184545 |
| 1                                  | 41.799642899 | 44.292585632 | 35.965038286 | 1                                     | 41.832324087 | 44.272799213 | 35.967493494 |
| 1                                  | 42.456957233 | 43.451806905 | 34.547243518 | 1                                     | 42.509104106 | 43.476525902 | 34.538170954 |
| 6                                  | 43.359829878 | 42.841107610 | 36.397384502 | 6                                     | 43.482066896 | 42.915234145 | 36.379074154 |
| 8                                  | 42.713527838 | 42.627351159 | 37.510117350 | 8                                     | 42.832693681 | 42.554046976 | 37.431991055 |
| 8                                  | 44.384342967 | 42.263337887 | 36.040061407 | 8                                     | 44.611402838 | 42.508774450 | 36.056349652 |
| 6                                  | 38.150324420 | 43.037510529 | 41.801069413 | 6                                     | 38.181819246 | 42.971072680 | 41.743443497 |
| 1                                  | 37.861305011 | 42.040619201 | 42.166464107 | 1                                     | 37.895239835 | 41.975113450 | 42.113559300 |
| 1                                  | 37.253911475 | 43.454153616 | 41.311447306 | 1                                     | 37.284365308 | 43.382594765 | 41.251081829 |
| 6                                  | 39.273796671 | 42.915503475 | 40.816122520 | 6                                     | 39.304766923 | 42.844479840 | 40.758014810 |
| 7                                  | 39.545673665 | 43.860403472 | 39.839480652 | 7                                     | 39.573064075 | 43.782347118 | 39.774443980 |
| 1                                  | 38.991201447 | 44.680920530 | 39.601889725 | 1                                     | 39.013047016 | 44.596903355 | 39.532086409 |
| 6                                  | 40.618106643 | 43.460476755 | 39.134961109 | 6                                     | 40.640940774 | 43.372186140 | 39.065710313 |
| 1                                  | 41.034127518 | 44.004689300 | 38.293296889 | 1                                     | 41.052051302 | 43.914192418 | 38.219787200 |
| 7                                  | 41.062606774 | 42.295973365 | 39.591036554 | 7                                     | 41.084812861 | 42.208793636 | 39.521855338 |
| 6                                  | 40.231741035 | 41.942820271 | 40.636208283 | 6                                     | 40.259260909 | 41.868347246 | 40.575772638 |
| 1                                  | 40.364557132 | 41.007689294 | 41.174113253 | 1                                     | 40.393054645 | 40.937559312 | 41.121426715 |
| 26                                 | 42.862184290 | 41.357090045 | 38.969447759 | 26                                    | 42.939658210 | 41.187594609 | 38.883428827 |
| 6                                  | 42.463684320 | 38.508157632 | 39.573492375 | 6                                     | 42.375301236 | 38.357825118 | 39.559970669 |
| 6                                  | 44.367039204 | 37.388893436 | 40.814049696 | 6                                     | 44.347401442 | 37.427566260 | 40.850246627 |
| 6                                  | 44.811129964 | 36.587391457 | 42.060548429 | 6                                     | 44.831697131 | 36.594657801 | 42.061264660 |
| 8                                  | 42.203241566 | 39.781447905 | 39.799313458 | 8                                     | 42.217764984 | 39.644059892 | 39.777222997 |
| 8                                  | 44.219598426 | 35.499279184 | 42.275040034 | 8                                     | 44.263146374 | 35.491308298 | 42.256571811 |
| 6                                  | 42.857604764 | 37.703541016 | 40.806619963 | 6                                     | 42.813698594 | 37.553359116 | 40.774044325 |
| 8                                  | 45.730728266 | 37.080157210 | 42.761228093 | 8                                     | 45.763853343 | 37.083336925 | 42.747552221 |
| 1                                  | 44.592570785 | 36.784035035 | 39.918115751 | 1                                     | 44.703895036 | 36.925155394 | 39.933051377 |
| 1                                  | 44.961768533 | 38.312645192 | 40.752873732 | 1                                     | 44.828965571 | 38.417732168 | 40.891511376 |
| 1                                  | 42.578893065 | 38.258978570 | 41.713993312 | 1                                     | 42.428779386 | 38.032622652 | 41.686259207 |
| 1                                  | 42.298766368 | 36.756483876 | 40.792821158 | 1                                     | 42.376043058 | 36.549522988 | 40.698845666 |
| 8                                  | 42.407929258 | 37.986758569 | 38.467628815 | 8                                     | 42.212614491 | 37.827040244 | 38.465713934 |
| 8                                  | 44.262428101 | 40.684127326 | 38.481998766 | 8                                     | 44.297378904 | 40.278804054 | 38.180883692 |
| 6                                  | 47.843439216 | 39.429657749 | 35.796977688 | 6                                     | 47.683073697 | 39.384774555 | 35.934559211 |
| 1                                  | 47.506821128 | 40.271536186 | 36.419532152 | 1                                     | 47.479378451 | 40.353657637 | 36.411496776 |
| 1                                  | 48.288902328 | 39.846775265 | 34.879069473 | 1                                     | 48.082251289 | 39.586067669 | 34.928528834 |
| 7                                  | 46.592375134 | 38.656611510 | 35.374946688 | 7                                     | 46.334116416 | 38.687808763 | 35.739051608 |
| 6                                  | 46.952679857 | 37.514407511 | 34.473343767 | 6                                     | 46.515699721 | 37.329169788 | 35.099444396 |
| 6                                  | 45.682153170 | 39.597226059 | 34.629855569 | 6                                     | 45.492189180 | 39.546052619 | 34.826194913 |
| 6                                  | 45.811806465 | 38.116926002 | 36.546204507 | 6                                     | 45.575053516 | 38.476130873 | 37.003826011 |
| 1                                  | 44.778290335 | 39.044313888 | 34.338420698 | 1                                     | 44.520137289 | 39.053400692 | 34.678773751 |
| 1                                  | 45.388654566 | 40.418851475 | 35.295059979 | 1                                     | 45.334713338 | 40.520536286 | 35.305172249 |
| 1                                  | 46.201540116 | 40.003602129 | 33.747549854 | 1                                     | 46.020594629 | 39.694108042 | 33.872941753 |

|   |              |              |              |   |              |              |              |
|---|--------------|--------------|--------------|---|--------------|--------------|--------------|
| 1 | 44.921145718 | 37.595200801 | 36.166584136 | 1 | 44.693977625 | 37.843211139 | 36.832642648 |
| 1 | 46.444415291 | 37.412231216 | 37.109348818 | 1 | 46.232227496 | 38.136790733 | 37.811782376 |
| 1 | 45.483345236 | 38.961466951 | 37.163790203 | 1 | 44.926516941 | 39.571771141 | 37.507213886 |
| 1 | 47.448151421 | 37.915940688 | 33.580014115 | 1 | 47.101150499 | 37.456232310 | 34.178963469 |
| 1 | 47.633475088 | 36.841203910 | 35.011220807 | 1 | 47.045887789 | 36.680211919 | 35.811061725 |
| 1 | 46.047745957 | 36.959115005 | 34.192598594 | 1 | 45.528158379 | 36.909066839 | 34.869225924 |
| 8 | 46.667292059 | 39.783340307 | 39.497928780 | 8 | 46.590143017 | 40.398994172 | 39.702440239 |
| 1 | 46.533298394 | 38.934573464 | 39.056196716 | 1 | 45.719715807 | 40.117982262 | 39.358662737 |
| 1 | 45.880608704 | 40.302448493 | 39.217603768 | 1 | 46.612701366 | 41.301976589 | 39.307952888 |
| 8 | 46.687062502 | 42.456091494 | 37.611240703 | 8 | 46.531821164 | 42.552321070 | 37.999546476 |
| 1 | 46.683074178 | 43.333084265 | 38.052747078 | 1 | 46.595137804 | 43.509854252 | 38.236733096 |
| 1 | 45.757794295 | 42.264515159 | 37.380694607 | 1 | 45.744034210 | 42.453166419 | 37.412561899 |
| 1 | 43.372409977 | 44.754314552 | 35.275608910 | 1 | 43.373377286 | 44.820364948 | 35.263771961 |
| 1 | 43.878544726 | 45.939401387 | 42.881747322 | 1 | 43.872852652 | 45.848851502 | 42.763954948 |
| 1 | 38.344922157 | 43.686484876 | 42.654902730 | 1 | 38.370394294 | 43.624418719 | 42.595291919 |
| 1 | 48.599591758 | 38.870431753 | 36.347946774 | 1 | 48.444939146 | 38.858249875 | 36.509363636 |

**IM3**  
**QM/MM Energy = -3024.048423**

|    |              |              |              |
|----|--------------|--------------|--------------|
| 6  | 44.640479059 | 45.217346264 | 42.546807270 |
| 1  | 45.251353665 | 45.711370893 | 41.776929950 |
| 1  | 45.280314637 | 45.101412895 | 43.435122889 |
| 6  | 44.175458651 | 43.903890004 | 42.000742007 |
| 7  | 43.600193339 | 42.896678852 | 42.753889293 |
| 1  | 43.432465054 | 42.911124798 | 43.769260221 |
| 6  | 43.232040965 | 41.900888191 | 41.928943423 |
| 1  | 42.733225969 | 40.989075421 | 42.246950221 |
| 7  | 43.546978280 | 42.201864933 | 40.674810224 |
| 6  | 44.141611691 | 43.444067312 | 40.703186983 |
| 1  | 44.508227150 | 43.928997247 | 39.802393053 |
| 6  | 42.687842919 | 43.982159018 | 35.516748775 |
| 1  | 41.748981168 | 44.362638185 | 35.930355306 |
| 1  | 42.459644263 | 43.499929517 | 34.552447188 |
| 6  | 43.284115911 | 42.938577011 | 36.458888451 |
| 8  | 42.613069025 | 42.692739735 | 37.516116119 |
| 8  | 44.369707173 | 42.379658371 | 36.156861472 |
| 6  | 38.006927133 | 43.115738966 | 41.899271264 |
| 1  | 37.706634211 | 42.127089457 | 42.277115186 |
| 1  | 37.100978345 | 43.557886793 | 41.451953862 |
| 6  | 39.079887347 | 42.962670419 | 40.865953851 |
| 7  | 39.350799036 | 43.901255431 | 39.882283498 |
| 1  | 38.828522983 | 44.749610108 | 39.673293802 |
| 6  | 40.380278512 | 43.462072314 | 39.136871714 |
| 1  | 40.786645104 | 43.996639033 | 38.283751722 |
| 7  | 40.797914103 | 42.280642714 | 39.572072709 |
| 6  | 39.992108796 | 41.956460132 | 40.646497955 |
| 1  | 40.112921909 | 41.018218074 | 41.183144043 |
| 26 | 42.638225604 | 41.256039998 | 39.025893746 |
| 6  | 42.209215274 | 38.375429755 | 39.665828291 |
| 6  | 44.261437889 | 37.435827383 | 40.840764045 |
| 6  | 44.792373117 | 36.618113450 | 42.042602647 |
| 8  | 42.051771887 | 39.661585925 | 39.909210587 |
| 8  | 44.256162886 | 35.499851018 | 42.249902982 |
| 6  | 42.725400480 | 37.560328063 | 40.841194748 |
| 8  | 45.719554540 | 37.132428285 | 42.717413164 |
| 1  | 44.573467661 | 36.925060385 | 39.912297453 |
| 1  | 44.741556814 | 38.427754446 | 40.846838376 |

**TS\_Rb**  
**QM/MM Energy = -3024.031138**

|    |              |               |              |
|----|--------------|---------------|--------------|
| 6  | 44.687455398 | 45.199747713  | 42.469591483 |
| 1  | 45.290227566 | 45.714493637  | 41.706833899 |
| 1  | 45.325041380 | 45.094974438  | 43.361292566 |
| 6  | 44.272614229 | 43.875301203  | 41.908807393 |
| 7  | 43.718198299 | 42.841084797  | 42.641717586 |
| 1  | 43.518367450 | 42.849673100  | 43.651819173 |
| 6  | 43.435949120 | 41.826657990  | 41.803189212 |
| 1  | 42.970411399 | 40.891466005  | 42.104473718 |
| 7  | 43.785514556 | 42.140511752  | 40.560011712 |
| 6  | 44.311235706 | 43.413720013  | 40.612288355 |
| 1  | 44.693679354 | 43.915520060  | 39.728213759 |
| 6  | 42.803597849 | 44.012168353  | 35.455283991 |
| 1  | 41.861524495 | 44.350306402  | 35.897703609 |
| 1  | 42.565944817 | 43.553098231  | 34.482102714 |
| 6  | 43.450351996 | 42.961741311  | 36.353348372 |
| 8  | 42.787137410 | 42.612763330  | 37.378555958 |
| 8  | 44.581846320 | 42.491355347  | 36.050189986 |
| 6  | 38.163259661 | 42.991400235  | 41.735459033 |
| 1  | 37.875012405 | 41.995249036  | 42.103823788 |
| 1  | 37.263406888 | 43.408840565  | 41.252367995 |
| 6  | 39.276644037 | 42.863341574  | 40.739366138 |
| 7  | 39.545591589 | 43.808401133  | 39.763279340 |
| 1  | 38.995439336 | 44.634457821  | 39.538380666 |
| 6  | 40.600595945 | 43.392933015  | 39.037875161 |
| 1  | 41.008263901 | 43.939758776  | 38.193499161 |
| 7  | 41.037755293 | 42.220331245  | 39.475528352 |
| 6  | 40.218812320 | 41.879058704  | 40.535414501 |
| 1  | 40.346479024 | 40.942357245  | 41.073698911 |
| 26 | 42.906567555 | 41.178004176  | 38.885624495 |
| 6  | 42.408366411 | 38.256778928  | 39.499420229 |
| 6  | 44.366152054 | 37.358137988  | 40.815072453 |
| 6  | 44.850422618 | 36.553405090  | 42.043075737 |
| 8  | 42.352627833 | 39.546338597  | 39.712916488 |
| 8  | 44.285012889 | 35.451369741  | 42.255550499 |
| 6  | 42.832258062 | 37.436820014  | 40.705093815 |
| 8  | 45.777322132 | 42.7061164234 | 42.722782725 |
| 1  | 44.759727559 | 36.859370766  | 39.910776957 |
| 1  | 44.811715916 | 38.366106445  | 40.852234354 |

|   |              |              |              |   |              |              |              |
|---|--------------|--------------|--------------|---|--------------|--------------|--------------|
| 1 | 42.388055879 | 38.028331004 | 41.777683774 | 1 | 42.414813875 | 37.895882674 | 41.614027878 |
| 1 | 42.287899253 | 36.555347012 | 40.776089235 | 1 | 42.420552029 | 36.425297321 | 40.606812392 |
| 8 | 41.979204800 | 37.856742084 | 38.580634595 | 8 | 42.180481431 | 37.731674333 | 38.410750717 |
| 8 | 44.056105913 | 40.419124842 | 38.154265055 | 8 | 44.412765611 | 40.391526524 | 37.861642763 |
| 6 | 48.087947570 | 39.173037100 | 35.584142488 | 6 | 47.605931751 | 39.347656792 | 35.908390783 |
| 1 | 47.951850839 | 40.227923979 | 35.873380146 | 1 | 47.467682977 | 40.363084130 | 36.307287144 |
| 1 | 48.491931758 | 39.155935589 | 34.562608333 | 1 | 47.968391575 | 39.443405483 | 34.874188421 |
| 7 | 46.697646819 | 38.544460552 | 35.532111119 | 7 | 46.216963252 | 38.704064866 | 35.834579410 |
| 6 | 46.745363081 | 37.110731891 | 35.058037663 | 6 | 46.288430380 | 37.260339729 | 35.364232198 |
| 6 | 45.850401208 | 39.345390458 | 34.565202736 | 6 | 45.396749560 | 39.477676261 | 34.831173539 |
| 6 | 46.029739463 | 38.582557535 | 36.834231995 | 6 | 45.501037722 | 38.692323888 | 37.133883100 |
| 1 | 44.863372712 | 38.868696951 | 34.493470611 | 1 | 44.382352784 | 39.054510567 | 34.797354583 |
| 1 | 45.735912541 | 40.364173738 | 34.955183894 | 1 | 45.347708429 | 40.527145678 | 35.139743053 |
| 1 | 46.353447462 | 39.391909663 | 33.588477771 | 1 | 45.890978361 | 39.421036261 | 33.851953228 |
| 1 | 45.051405069 | 38.106914794 | 36.897618100 | 1 | 44.574509309 | 38.117227834 | 37.102275152 |
| 1 | 46.477633827 | 39.180956005 | 37.626925279 | 1 | 46.171629584 | 38.575024406 | 37.984144598 |
| 1 | 44.312806135 | 40.897576340 | 37.339338140 | 1 | 44.642790500 | 41.033850568 | 37.154241120 |
| 1 | 47.233047341 | 37.079316622 | 34.075122541 | 1 | 46.848729326 | 37.230477675 | 34.419876105 |
| 1 | 47.299169001 | 36.521348003 | 35.802618019 | 1 | 46.796388997 | 36.669402066 | 36.141708688 |
| 1 | 45.717779923 | 36.733709977 | 34.976963835 | 1 | 45.261671484 | 36.896916062 | 35.214059098 |
| 8 | 46.410750262 | 40.433990019 | 39.533927142 | 8 | 46.547853377 | 40.542758433 | 39.638016682 |
| 1 | 45.515350987 | 40.215136041 | 39.178549460 | 1 | 45.760898957 | 40.309080867 | 39.099820131 |
| 1 | 46.498805145 | 41.337870412 | 39.151909508 | 1 | 46.602764751 | 41.490948711 | 39.394352933 |
| 8 | 46.507430633 | 42.629144435 | 37.873994014 | 8 | 46.541304073 | 42.798426972 | 37.982786078 |
| 1 | 46.593390927 | 43.565583094 | 38.183883963 | 1 | 46.667239056 | 43.747014027 | 38.240440089 |
| 1 | 45.687960880 | 42.582361076 | 37.330745381 | 1 | 45.791719806 | 42.775194514 | 37.349813045 |
| 1 | 43.338207102 | 44.826492762 | 35.288288103 | 1 | 43.427994189 | 44.879369376 | 35.240437737 |
| 1 | 43.837314251 | 45.891564737 | 42.844167424 | 1 | 43.869844412 | 45.856298920 | 42.767114777 |
| 1 | 38.262346556 | 43.757006825 | 42.742837368 | 1 | 38.361037848 | 43.640542522 | 42.588433480 |
| 1 | 48.796171994 | 38.706642080 | 36.268949892 | 1 | 48.368821778 | 38.836472311 | 36.495550512 |

PD

QM/MM Energy = -3024.142064

|   |              |              |              |
|---|--------------|--------------|--------------|
| 6 | 44.627204653 | 45.209746808 | 42.441729020 |
| 1 | 45.232094799 | 45.725594781 | 41.680529376 |
| 1 | 45.275627306 | 45.071535569 | 43.320840018 |
| 6 | 44.160623352 | 43.909794860 | 41.861961807 |
| 7 | 43.681547975 | 42.844553707 | 42.599309639 |
| 1 | 43.555929170 | 42.820444455 | 43.619953405 |
| 6 | 43.314656963 | 41.869147680 | 41.737414126 |
| 1 | 42.903537973 | 40.911145879 | 42.046836796 |
| 7 | 43.527773866 | 42.237999283 | 40.483439902 |
| 6 | 44.059128955 | 43.504668744 | 40.547353687 |
| 1 | 44.331916361 | 44.054856293 | 39.651016297 |
| 6 | 42.742901160 | 44.005551219 | 35.411323639 |
| 1 | 41.818580978 | 44.336962404 | 35.894377423 |
| 1 | 42.484515996 | 43.572212018 | 34.432302304 |
| 6 | 43.428755595 | 42.942570675 | 36.266016388 |
| 8 | 42.915882922 | 42.694567423 | 37.395101167 |
| 8 | 44.474780761 | 42.385683657 | 35.823775526 |
| 6 | 37.978074114 | 43.168355985 | 41.843726597 |
| 1 | 37.663107646 | 42.177865183 | 42.204464490 |
| 1 | 37.078317663 | 43.631667167 | 41.405017824 |
| 6 | 39.044205518 | 43.011128709 | 40.803412683 |
| 7 | 39.354101171 | 43.962403080 | 39.846686877 |
| 1 | 38.885484512 | 44.850698346 | 39.676680880 |
| 6 | 40.351928878 | 43.487116342 | 39.075486820 |

|    |              |              |              |
|----|--------------|--------------|--------------|
| 1  | 40.779494178 | 44.033487094 | 38.238399126 |
| 7  | 40.707652123 | 42.271260867 | 39.465474270 |
| 6  | 39.901461802 | 41.965344378 | 40.543363616 |
| 1  | 39.979417369 | 41.017925577 | 41.073500422 |
| 26 | 42.476159689 | 41.265084537 | 38.783269338 |
| 6  | 42.579452273 | 38.305335386 | 39.504081407 |
| 6  | 44.493385479 | 37.239153600 | 40.814592838 |
| 6  | 44.896277245 | 36.435739677 | 42.065445107 |
| 8  | 43.024779874 | 39.537357702 | 39.584971283 |
| 8  | 44.281558102 | 35.358504309 | 42.273248398 |
| 6  | 42.975845605 | 37.415536611 | 40.669206062 |
| 8  | 45.812928945 | 36.921105399 | 42.776636961 |
| 1  | 44.878945002 | 36.709792742 | 39.925261253 |
| 1  | 44.994989921 | 38.214005124 | 40.851666473 |
| 1  | 42.573833935 | 37.884058590 | 41.584843001 |
| 1  | 42.484100507 | 36.443235721 | 40.553642281 |
| 8  | 41.885451006 | 37.888451745 | 38.576479204 |
| 8  | 45.042860782 | 39.799576856 | 36.274370514 |
| 6  | 48.432397513 | 38.780735600 | 35.161009052 |
| 1  | 48.689272464 | 39.794592732 | 34.818749442 |
| 1  | 48.755310266 | 38.073623538 | 34.383595025 |
| 7  | 46.921571744 | 38.701644361 | 35.236763971 |
| 6  | 46.419623639 | 37.316449150 | 35.547359366 |
| 6  | 46.359755208 | 39.118806751 | 33.916560431 |
| 6  | 46.399961608 | 39.683255595 | 36.327260500 |
| 1  | 45.268764438 | 39.030647864 | 33.966710982 |
| 1  | 46.636686304 | 40.158177291 | 33.684727974 |
| 1  | 46.768578738 | 38.460707393 | 33.138182513 |
| 1  | 46.725470250 | 39.243295604 | 37.283722347 |
| 1  | 46.940288251 | 40.628005650 | 36.143392271 |
| 1  | 44.789505130 | 40.723408804 | 36.023886786 |
| 1  | 46.670519061 | 36.647358611 | 34.712139520 |
| 1  | 46.885084433 | 36.956503415 | 36.478237251 |
| 1  | 45.328452579 | 37.367555988 | 35.667434923 |
| 8  | 45.967062746 | 40.128262588 | 39.680463212 |
| 1  | 45.026178491 | 39.872137112 | 39.615234522 |
| 1  | 45.995130546 | 41.020329756 | 39.284863456 |
| 8  | 46.313621916 | 42.430381846 | 37.981285262 |
| 1  | 46.391585341 | 43.369666679 | 38.281463999 |
| 1  | 45.569368004 | 42.413236069 | 37.339223118 |
| 1  | 43.360456296 | 44.877610454 | 35.196368607 |
| 1  | 43.830209629 | 45.879371604 | 42.764945494 |
| 1  | 38.241389718 | 43.789303947 | 42.699971799 |
| 1  | 48.984892196 | 38.545462295 | 36.070659218 |

## References

(1) (a) S. S. Ng, K. L. Kavanagh, M. A. McDonough, D. Butler, E. S. Pilka, B. M. R. Lienard, J. E. Bray, P. Savitsky, O. Gileadi, F. Von Delft, N. R. Rose, J. Offer, J. C. Scheinost, T. Borowski, M. Sundstrom, C. J. Schofield, and U. Oppermann, *Nature* 2007, **448**, 87–91. (b) J. R. Horton, A.

- K. Upadhyay, H. H. Qi, X. Zhang, Y. Shi and X. Cheng, *Nat. Struct. Mol. Biol.* 2010, **17**, 38–44.
- (c) A. Kawamura, M. Münzel, T. Kojima, C. Yapp, B. Bhushan, Y. Goto, A. Tumber, T. Katoh, O. N. F. King, T. Passioura, L. J. Walport, S. B. Hatch, S. Madden, S. Müller, P. E. Brennan, R. Chowdhury, R. J. Hopkinson, H. Suga and C. J. Schofield, *Nat. Commun.* 2017, **8**, 14773.
- (2) R. Salomon-Ferrer, A. W. Götz, D. Poole, S. Le Grand and R. C. Walker, *J. Chem. Theory Comput.* 2013, **9**, 3878–3888.
- (3) P. Li and K. M. Merz, *J. Chem. Inf. Model.* 2016, **56**, 599–604.
- (4) (a) T. Borowski, A. Bassan and P. E. M. Siegbahn, *Chem. - A Eur. J.* 2004, **10**, 1031–1041.  
(b) A. Wójcik, M. Radoń, and T. Borowski, *J. Phys. Chem. A* 2016, **120**, 1261–1274.
- (5) A. Pabis, I. Geronimo, D. M. York, and P. Paneth, *J. Chem. Theory Comput.* 2014, **10**, 2246–2254.
- (6) M. B. Peters, Y. Yang, B. Wang, L. Füsti-Molnár, M. N. Weaver and K. M. Merz, *J. Chem. Theory Comput.* 2010, **6**, 2935–2947.
- (7) J. A. Maier, C. Martinez, K. Kasavajhala, L. Wickstrom, K. E. Hauser and C. Simmerling, *J. Chem. Theory Comput.* 2015, **11**, 3696–3713.
- (8) W. L. Jorgensen, J. Chandrasekhar, J. D. Madura, R. W. Impey and M. L. Klein, *J. Chem. Phys.* 1983, **79**, 926–935.
- (9) T. Darden, D. York and L. Pedersen, *J. Chem. Phys.* 1993, **98**, 10089–10092.
- (10) J. A. Lzguirre, D. P. Catarello, J. M. Wozniak and R. D. Skeel, *J. Chem. Phys.* 2001, **114**, 2090–2098.
- (11) H. J. C. Berendsen, J. P. M. Postma, W. F. Van Gunsteren, A. Dinola and J. R. Haak, *J. Chem. Phys.* 1984, **81**, 3684–3690.
- (12) J. P. Ryckaert, G. Ciccotti and H. J. C. Berendsen, *J. Comput. Phys.* 1977, **23**, 327–341.

- (13) D. R. Roe, and T. E. Cheatham, *J. Chem. Theory Comput.* 2013, **9**, 3084–3095.
- (14) W. Humphrey, A. Dalke and K. Schulten, *J. Mol. Graph.* 1996, **14**, 33–38.
- (15) E. F. Pettersen, T. D. Goddard, C. C. Huang, G. S. Couch, D. M. Greenblatt, E. C. Meng and T. E. Ferrin, *J. Comput. Chem.* 2004, **25**, 1605–1612.
- (16) B. J. Grant, A. P. C. Rodrigues, K. M. ElSawy, J. A. McCammon and L. S. D. Caves, *Bioinformatics* 2006, **22**, 2695–2696.
- (17) P. Sherwood, A. H. De Vries, M. F. Guest, G. Schreckenbach, C. R. A. Catlow, S. A. French, A. A. Sokol, S. T. Bromley, W. Thiel, A. J. Turner, S. Billeter, F. Terstegen, S. Thiel, J. Kendrick, S. C. Rogers, J. Casci, M. Watson, F. King, E. Karlsen, M. Sjøvoll, A. Fahmi, A. Schäfer and C. Lennartz, *J. Mol. Struct. THEOCHEM* 2003, **632**, 1–28.
- (18) S. Metz, J. Kästner, A. A. Sokol, T. W. Keal and P. Sherwood, *Wiley Interdiscip. Rev. Comput. Mol. Sci.* 2014, **4**, 101–110.
- (19) R. Ahlrichs, M. Bär, M. Häser, H. Horn and C. Kölmel, *Chem. Phys. Lett.* 1989, **162**, 165–169.
- (20) W. Smith and T. R. Forester, *J. Mol. Graph.* 1996, **14**, 136–141.
- (21) D. Bakowies and W. Thiel, *J. Phys. Chem.* 1996, **100**, 10580–10594.
- (22) A. D. Becke, *J. Chem. Phys.* 1993, **98**, 5648–5652.
- (23) A. Schäfer, H. Horn and R. Ahlrichs, *J. Chem. Phys.* 1992, **97**, 2571–2577.
- (24) R. Ramanan, K. D. Dubey, B. Wang, D. Mandal and S. Shaik, *J. Am. Chem. Soc.* 2016, **138**, 6786–6797.
- (25) J. Kästner, J. M. Carr, T. W. Keal, W. Thiel, A. Wander and P. Sherwood, *J. Phys. Chem. A* 2009, **113**, 11856–11865.
- (26) S. R. Billeter, A. J. Turner and W. Thiel, *Phys. Chem. Chem. Phys.* 2000, **2**, 2177–2186.

(27) A. J. Mitchell, N. P. Dunham, R. J. Martinie, J. A. Bergman, C. J. Pollock, K. Hu, B. D. Allen, W. C. Chang, A. Silakov, J. M. Bollinger, C. Krebs, A K. Boal, *J. Am. Chem. Soc.* 2017, **139**, 13830–13836.
